# Supplementary material
Source: PubMed Central journal article supplement (PMC8905400)
Supplement: jama-e221682-s001.pdf [file jama-e221682-s001.pdf]

## **Supplementary Online Content**

Parks RM, Benavides J, Anderson GB, et al. Association of tropical cyclones with county-level mortality in the US. *JAMA*. doi:10.1001/jama.2022.1682

**eAppendix**

**eTables 1-12**

**eFigures 1-13**

This supplementary material has been provided by the authors to give readers additional information about their work.

**eAppendix.** Supplemental methods.

**eTable 1.** Causes of death used in the analysis with ICD-9 and ICD-10 codes.

**eTable 2.** Summary statistics by percentile of the tropical cyclone-exposed county units used in the analysis at beginning (1988) and end (2018) of study period.

**eTable 3.** Summary statistics by percentile of the hurricane-exposed county units used in the analysis at beginning (1988) and end (2018) of study period.

**eTable 4.** Percentage change in death rates per one day increase in monthly tropical cyclone or hurricane-only exposure by cause of death, and lag time. Lag time was measured in months after tropical cyclone or hurricane. This Table accompanies Figure 2 from the main manuscript. Pneumonia-type deaths were classified as respiratory diseases.

**eTable 5.** Percentage change in death rates per one day increase in monthly tropical cyclone exposure by cause of death, age group (0-64 years, 65+ years), and lag time. Lag time was measured in months after tropical cyclone. This Table accompanies Figure 3 from the main manuscript. Pneumonia-type deaths were classified as respiratory diseases.

**eTable 6.** Percentage change in death rates per one day increase in monthly tropical cyclone exposure by cause of death, social vulnerability tertiles, and lag time. The first tertile (SVI 1) represents lowest social vulnerability and the third tertile (SVI 3) represents highest social vulnerability. Lag time was measured in months after tropical cyclone. This Table accompanies Figure 4 from the main manuscript. Pneumonia-type deaths were classified as respiratory diseases.

**eTable 7.** Posterior probability for cancers that one effect estimate was larger than another, using comparisons of 1,000 draws the posterior marginal distribution of each effect estimate.

**eTable 8.** Posterior probability for cardiovascular diseases that one effect estimate was larger than another, using comparisons of 1,000 draws the posterior marginal distribution of each effect estimate.

**eTable 9.** Posterior probability for infectious and parasitic diseases that one effect estimate was larger than another, using comparisons of 1,000 draws the posterior marginal distribution of each effect estimate.

**eTable 10.** Posterior probability for injuries that one effect estimate was larger than another, using comparisons of 1,000 draws the posterior marginal distribution of each effect estimate.

**eTable 11.** Posterior probability for neuropsychiatric conditions that one effect estimate was larger than another, using comparisons of 1,000 draws the posterior marginal distribution of each effect estimate.

**eTable 12.** Posterior probability for respiratory diseases that one effect estimate was larger than another, using comparisons of 1,000 draws the posterior marginal distribution of each effect estimate.

**eFigure 1.** Best-track routes of each tropical cyclone listed in Table 1 in main paper by year, 1980 – 2018.

**eFigure 2.** Number of deaths by cause, month, sex, and age group (0-64 years, 65+ years) in counties exposed to tropical cyclones in the United States for 1988 – 2018. The values in the plot represent the total counts of deaths in any county with at least one tropical cyclone exposure (n=33,619,393). Pneumonia-type deaths were classified as respiratory diseases.

**eFigure 3.** Number of deaths by cause, month, sex, and age group (0-64 years, 65+ years) in counties exposed to hurricanes in the United States for 1988 – 2018. The values in the plot represent the total counts of deaths in any county with at least one hurricane exposure (n=5,749,787). Pneumonia-type deaths are classified as respiratory diseases.

**eFigure 4.** 2018 Social Vulnerability Index (SVI) tertiles for included counties (n=1,206). The range is from 1 (least vulnerable) to 3 (most vulnerable).

**eFigure 5.** Comparison of Social Vulnerability Index (SVI) percentiles for 2000 and 2018 for included counties (n=1,206). The range is from 0% (least vulnerable) to 100% (most vulnerable).

**eFigure 6.** Percentage change in death rates per one day increase in monthly hurricane exposure by cause of death, age group (0-64 years, 65+ years), and lag time. Lag time was measured in months after hurricane. Dots show the point estimates and whiskers represent 95% credible intervals. Numbers in the top-right of each panel represent overall and age group-specific deaths per 1,000,000 for 2018 monthly age-standardized median rate (DPM) for hurricane-exposed counties. Pneumonia-type deaths were classified as respiratory diseases.

**eFigure 7.** Percentage change in death rates per one day increase in monthly tropical cyclone exposure by cause of death, age group (0-24 years, 25-44 years, 45-64 years, 65-84 years and 85+ years), and lag time. Lag time was measured in months after tropical cyclone. Dots show the point estimates and whiskers represent 95% credible intervals. Numbers in the top-right of each panel represent overall and age group-specific deaths per 1,000,000 for 2018 monthly age-standardized median rate (DPM) for tropical cyclone-exposed counties. Pneumonia-type deaths were classified as respiratory diseases.

**eFigure 8.** Percentage change in death rates per one day increase in monthly hurricane exposure by cause of death, age group (0-24 years, 25-44 years, 45-64 years, 65-84 years and 85+ years), and lag time. Lag time was measured in months after hurricane. Dots show the point estimates and whiskers represent 95% credible intervals. Numbers in the top-right of each panel represent overall and age group-specific deaths per 1,000,000 for 2018 monthly age-standardized median rate (DPM) for hurricane-exposed counties. Pneumonia-type deaths were classified as respiratory diseases.

**eFigure 9.** Percentage change in death rates per one day increase in monthly tropical cyclone exposure by cause of death, sex, and lag time. Lag time was measured in months after tropical cyclone. Dots show the point estimates and whiskers represent 95% credible intervals. Numbers in the top-right of each panel represent overall and sex-specific deaths per 1,000,000 for 2018 monthly age-standardized median rate (DPM) for tropical cyclone-exposed counties. Pneumonia-type deaths were classified as respiratory diseases.

**eFigure 10.** Percentage change in death rates per one day increase in monthly hurricane exposure by cause of death, sex, and lag time. Lag time was measured in months after hurricane. Dots show the point estimates and whiskers represent 95% credible intervals. Numbers in the top-right of each panel represent overall and sex-specific deaths per 1,000,000 for 2018 monthly age-standardized median rate (DPM) for hurricane-exposed counties. Pneumonia-type deaths were classified as respiratory diseases.

**eFigure 11.** Percentage change in death rates per one day increase in monthly hurricane exposure by cause of death, social vulnerability tertiles, and lag time. The first tertile (blue) represents lowest social vulnerability and the third tertile (red) represents highest social vulnerability. Lag time was measured in months after hurricane. Dots show the point estimates and whiskers represent 95% credible intervals. Numbers in the top-right of each panel represent overall and social vulnerability tertile-specific deaths per 1,000,000 for 2018 monthly age-standardized median rate (DPM) for hurricane-exposed counties. Pneumonia-type deaths were classified as respiratory diseases.

**eFigure 12.** Comparison of lag-specific coefficients by class of tropical cyclone when including or not including temperature term ( $v_{temperature_{ct}}$ ). The values from the main model are on the x-axis with values from alternative model without temperature on the y-axis. Dots show the point estimates and whiskers represent 95% credible intervals. Pneumonia-type deaths were classified as respiratory diseases.

**eFigure 13.** Comparison of lag-specific coefficients by class of tropical cyclone when including or not including limit on matching control periods. The values from the main model are on the x-axis with values from alternative model with constraint of matched control periods being in same 5-year on the y-axis. Dots show the point estimates and whiskers represent 95% credible intervals. Pneumonia-type deaths were classified as respiratory diseases.

## eAppendix. Supplemental methods

### eMethods 1. Details on tropical cyclone data, mortality data, covariate data, and statistical analysis

#### Data sources

##### *Exposure*

We obtained data on tropical cyclone wind exposure in the United States, with full space and time coverage over our study period, and described in detail elsewhere.<sup>1-8</sup> In brief, we used daily estimates of maximum wind sustained speed by county to generate classifications of these exposures. As in previous work,<sup>8</sup> we defined hurricane exposure when the peak sustained wind that day in the population center of the county associated with the tropical cyclone at the point of closest approach reached or exceeded 64 knots (119 km/h, 74 mph; hurricane-force wind on the Beaufort scale<sup>9</sup>). We similarly defined tropical cyclone exposure as all days which reached or exceeded 34 knots (63 km/h, 39 mph; gale-force wind on the Beaufort scale<sup>9</sup>). A full list of included tropical cyclones is found in Table 1 in the main paper, with a map of tropical cyclone exposure counts in Figure 1 in the main paper. A plot of best-track routes of each tropical cyclone by year is found in eFigure 1.

The mean time difference between consecutive tropical cyclones in all counties was 45 months. No county which experienced a tropical cyclone in November of a particular year also experienced a cyclone in May of the subsequent year. Given our modelling structure (as described below), tropical cyclones from the following cyclone season could not have impacted results from the examined year, since May is six calendar months after November. Tropical cyclone days in all counties were discrete and non-consecutive. Therefore, each tropical cyclone exposure episode was of length one day throughout our study period. In county-months with more than one tropical cyclone exposure (123; 2.5% of 4,842 county-months) the mean number of days between exposures was 15 days. The greatest number of tropical cyclone days in a single county-month was 3, and occurred only in one county-month (Brunswick County, North Carolina in August 2004).

##### *Outcomes*

We used data on deaths from six studied causes (cancers, cardiovascular diseases, infectious and parasitic diseases, injuries, neuropsychiatric conditions, and respiratory diseases) by sex, age, underlying cause of death, and county of residence in counties that experienced at least one tropical cyclone exposure from 1988 to 2018 through the National Center for Health Statistics (NCHS) (n=33,619,393; 86.7% of total deaths in tropical cyclone-exposed counties) ([https://www.cdc.gov/nchs/nvss/dvs\\_data\\_release.htm](https://www.cdc.gov/nchs/nvss/dvs_data_release.htm)) and on population from the NCHS Vintage 2020 bridged-race dataset (though no analysis by race was carried out) for 1990 to 2018 ([https://www.cdc.gov/nchs/nvss/bridged\\_race.htm](https://www.cdc.gov/nchs/nvss/bridged_race.htm)) and from the US Census Bureau prior to 1990 (<https://www.census.gov/data/tables/time-series/demo/popest/1980s-county.html>) (eFigure 2). Race bridging, though not utilized in this analysis, refers to making data collected using one set of race categories consistent with data collected using a different set of race categories, to permit estimation. We also used a subset of these data which fell into counties that experienced at least one hurricane exposure in our study period (n=5,749,787) (eFigure 3). The underlying cause of death was coded according to the *International Classification of Diseases* (ICD) system (9<sup>th</sup> revision from 1988 to 1998 and 10<sup>th</sup> revision thereafter) and WHO Global Health Estimate cause categories (eTable 1).<sup>10</sup> We calculated monthly population counts through linear interpolation, assigning each yearly count to June. A summary of these data is found in eTables 2-3.

### Covariate data

We obtained data on temperature from the Parameter-elevation Regressions on Independent Slopes Model (PRISM), which gathers climate observations from a wide range of monitoring networks and applies sophisticated quality control measures to generate a nationwide temperature dataset, with full space and time coverage over our study period.<sup>11</sup> We used gridded daily estimates at a resolution of 4 km to generate area-weighted monthly average temperatures by county. A summary of these data is found in eTables 2-3.

We used data on social vulnerability from the Centers for Disease Control and Prevention (CDC) Social Vulnerability Index (SVI) for 2018 ([https://www.atsdr.cdc.gov/placeandhealth/svi/documentation/SVI\\_documentation\\_2018.html](https://www.atsdr.cdc.gov/placeandhealth/svi/documentation/SVI_documentation_2018.html)). The SVI incorporates data from the US Census on socioeconomic status; household composition and disability; minority status and language; and housing type and transportation to determine the relative social vulnerability of every US county.<sup>12</sup> A county's SVI value indicates the relative vulnerability of every United States county compared with every other United States county, ranking from 0% (lowest vulnerability county in country) to 100% (highest vulnerability county in country). We divided the 1,206 counties included in our main analysis into SVI tertiles (low vulnerability to high vulnerability, 1 to 3; eFigure 4). Each tertile contained 402 counties. We used the same SVI tertile values for each county throughout analyses involving SVI stratification. When comparing the first year of available SVI data (2000) ([https://www.atsdr.cdc.gov/placeandhealth/svi/documentation/SVI\\_documentation\\_2000.html](https://www.atsdr.cdc.gov/placeandhealth/svi/documentation/SVI_documentation_2000.html)) to the SVI data we used from 2018, we found a correlation of 0.91 (eFigure 5). A summary of population, cause-specific death rates, and temperature is found by SVI in eTables 2-3.

### Statistical analysis

Via a log-link function, we modelled death counts, for each cause of death separately, as follows:

$$\begin{aligned} \log(E[\text{deaths}_{ct}]) \\ = \alpha_0 + \alpha_c + \sum_{l=0}^6 \beta_l \text{Exposure}_{lct} + ns(\text{time}) + \nu_{\text{temperature}_{ct}} \\ + \log(\text{Population}_{ct}), \end{aligned}$$

where  $\text{deaths}_{ct}$  denotes the number of cause-specific deaths in county  $c$  and time  $t$ ;  $\alpha_0$  the common intercept;  $\alpha_c$  the stratum-specific intercepts (not estimated in the conditional Poisson model);  $\beta_l$  lag-specific coefficients (log rate ratios) for tropical cyclone exposure counts ( $\text{Exposure}_{lct}$ ), with lags  $l$  between the month of tropical cyclone exposure and month of death (lags 0 to 6);  $ns(\text{time})$  a natural spline with knots every three months during the study period to capture long-term time trends, as well as season-to-season variation in death rates;<sup>13</sup>  $\nu_{\text{temperature}_{ct}}$  a second-order random walk to flexibly model the temperature – mortality relationship for temperature values ( $\text{temperature}_{ct}$ ), widely used to characterize smoothly varying associations and equivalent to a spline with equally-spaced knots;<sup>14</sup> and  $\log(\text{Population}_{ct})$  the offset with  $\text{Population}_{ct}$  the population in each county  $c$  at time  $t$ .

We used weakly informative priors so that parameter estimation was driven by the data. As in previous analyses,<sup>15,16</sup> hyper-priors were defined on the logarithm of the precision of the second-order random walk (i.e., the precision of  $\nu_{\text{temperature}_{ct}}$ ) as well as the stratum-specific

intercepts (i.e., the precision of  $\alpha_c$ ), in other words on  $\log(1/\sigma^2)$ . This was modeled as  $\text{logGamma}(\theta, \delta)$  distributions with shape  $\theta = 1$  and rate  $\delta = 0.001$ . For the other terms in the model, we used  $N(0,1000)$ .

We investigated the association of all tropical cyclone exposures together ( $\geq 34$  knots), and used stratified modeling to separately estimate effects of exposure to hurricane-force ( $\geq 64$  knots; including 153 counties with at least one exposure) intensities for each cause of death (Figure 2 in main paper). We assessed whether estimated effects varied by age group ((i) 0-64 years or 65+ years for main analysis or (ii) 0-24 years, 25-44 years, 45-64 years, 65-84 years and 85+ years for a supplementary analysis) (Figure 3 in main paper and eFigures 6-8) and by sex (female or male) (eFigures 9-10) by conducting stratified analyses, using the same model as described above and the corresponding age group- or sex-specific population offset. We also assessed whether estimated effects varied by social vulnerability by fitting stratified analyses by SVI tertile (low vulnerability to high vulnerability, 1 to 3), using the same model as described above with county-specific population offsets (Figure 4 in main paper and eFigure 11). Values from Figures 2-4 in the main paper are found in eTables 4-6.

The reported 95% credible intervals (CrI) are the 2.5<sup>th</sup> to 97.5<sup>th</sup> percentiles of each estimated parameter's posterior marginal distribution. Any reported positive association was based on a positive point estimate with a two-sided 95% credible intervals which excluded the null, with a negative association the same but with a negative point estimate. To formally and quantitatively calculate the probability that one effect estimate was greater than another, we obtained 1,000 draws from the posterior marginal distribution of each effect estimate.<sup>17</sup> The proportion of draws that was higher than the other set of draws represented the probability that one effect estimate was higher than the one compared to. Full results for this formal comparison of model parameters are found in eTables 7-12.

## **eMethods 2. Statistical methods for the sensitivity analyses**

### *Sensitivity analyses*

First, we assessed the sensitivity of our results to temperature adjustment; we fit models without the described temperature term and compared results to the main model (eFigure 12). Second, we performed a stricter matching analysis, limiting matched county-months for comparison in the same 5-year period (1988-1992, 1993-1997, ..., 2008-2012, with 2013-2018 as 6-year period to include all data) (eFigure 13). For temperature sensitivity analyses (eFigure 12), there was correlation of  $R=0.99$  and a slope of 1.00 [95%CrI,0.98–1.01] between estimates of associations with (main) and without (sensitivity) temperature in the model. For sensitivity analyses limiting county-month matching to control periods in nearby years (eFigure 13), there was a correlation of  $R=0.95$  and a slope of 0.95 [95%CrI,0.88–1.05] between estimates of associations without (main) and with (sensitivity) the 5-year matching control period restriction. The same conclusions would be drawn from the main and sensitivity analyses.

## References

1. Anderson GB, Yan M, Ferreri J, et al. hurricaneexposure: Explore and map county-level hurricane exposure in the United States. *R package version 011*. Published online 2020.
2. Anderson GB, Eddelbuettel D. Hosting data packages via drat: A case study with hurricane exposure data. *R Journal*. Published online 2017. doi:10.32614/rj-2017-026
3. Anderson GB, Ferreri J, Al-Hamdan M, et al. Assessing United States County-Level Exposure for Research on Tropical Cyclones and Human Health. *Environmental health perspectives*. 2020;128(10):107009. doi:10.1289/EHP6976
4. Anderson GB, Schumacher A, Crosson W, et al. hurricaneexposuredata: Data Characterizing Exposure to Hurricanes in United States Counties. *R package version 010*. Published online 2020.
5. Landsea C, Franklin J, Beven J. The revised Atlantic hurricane database (HURDAT2). *The National Hurricane Center*. Published online 2014.
6. Anderson GB, Schumacher A, Guikema S, Quiring S, Ferreri J. stormwindmodel: Model tropical cyclone wind speeds. Published online 2020.
7. Willoughby HE, Darling RWR, Rahn ME. Parametric representation of the primary hurricane vortex. Part II: A new family of sectionally continuous profiles. *Monthly Weather Review*. Published online 2006. doi:10.1175/MWR3106.1
8. Parks RM, Anderson GB, Nethery RC, Navas-Acien A, Dominici F, Kioumourtzoglou MA. Tropical cyclone exposure is associated with increased hospitalization rates in older adults. *Nature Communications*. 2021;12(1):1-12.
9. National Meteorological Library. National meteorological library and archive fact sheet 6 — The Beaufort Scale. *MET Office*. Published online 2010.
10. Boerma T, Mathers CD. The World Health Organization and global health estimates: improving collaboration and capacity. *BMC medicine*. 2015;13(1):1-4.
11. PRISM Climate Group. The PRISM Climate and Weather System - An Introduction. Published online 2013. [https://prism.oregonstate.edu/documents/PRISM\\_history\\_jun2013.pdf](https://prism.oregonstate.edu/documents/PRISM_history_jun2013.pdf)
12. Flanagan BE, Hallisey EJ, Adams E, Lavery A. Measuring community vulnerability to natural and anthropogenic hazards: the Centers for Disease Control and Prevention's Social Vulnerability Index. *Journal of environmental health*. 2018;80(10):34.
13. Parks RM, Bennett JE, Foreman KJ, Toumi R, Ezzati M. National and regional seasonal dynamics of all-cause and cause-specific mortality in the USA from 1980 to 2016. *eLife*. 2018;7:e35500. doi:10.7554/eLife.35500
14. Rue H, Held L. *Gaussian Markov Random Fields: Theory and Applications*. CRC press; 2005.
15. Parks RM, Bennett JE, Tamura-Wicks H, et al. Anomalously warm temperatures are associated with increased injury deaths. *Nature Medicine*. 2020;26(1):65-70. doi:10.1038/s41591-019-0721-y
16. Bennett JE, Tamura-Wicks H, Parks RM, et al. Particulate matter air pollution and national and county life expectancy loss in the USA: A spatiotemporal analysis. *PLOS Medicine*. 2019;16(7):e1002856. doi:10.1371/journal.pmed.1002856
17. Gelman A, Carlin JB, Stern HS, Dunson DB, Vehtari A, Rubin DB. *Bayesian Data Analysis, Third Edition*. CRC Press; 2013.



**eTable 1.** Causes of death used in the analysis with ICD-9 and ICD-10 codes.

| <b>Cause of death</b>             | <b>ICD-9</b>                          | <b>ICD-10</b>                                          |
|-----------------------------------|---------------------------------------|--------------------------------------------------------|
| Cancers                           | 140-239                               | C00-C99, D00-D49                                       |
| Cardiovascular diseases           | 390-459                               | I00-I99                                                |
| Infectious and parasitic diseases | 0-139, 279.5-279.6,<br>320-323, 771.3 | A00-A99, B00-B99, G00-G05, G14, N70-<br>N74            |
| Injuries                          | E800-E999                             | V00-Y99, W00-W99, X00-X40, X43-44,<br>X46-X99, Y00-Y89 |
| Neuropsychiatric conditions       | 290-319, 324-359                      | F00-F99, G06-G13, G15-98, X41-X42, X45                 |
| Respiratory diseases              | 381-382, 460-519                      | H62-H67, J00-J99                                       |

**eTable 2.** Summary statistics by percentile of the tropical cyclone-exposed county units used in the analysis at beginning (1988) and end (2018) of study period.

| <b>Tropical cyclone-exposed counties</b>                                           |                   |             |            |             |             |             |             |             |             |            |             |             |             |             |             |
|------------------------------------------------------------------------------------|-------------------|-------------|------------|-------------|-------------|-------------|-------------|-------------|-------------|------------|-------------|-------------|-------------|-------------|-------------|
|                                                                                    |                   | <b>1988</b> |            |             |             |             |             |             | <b>2018</b> |            |             |             |             |             |             |
| <b>Percentile</b>                                                                  |                   | <b>1st</b>  | <b>5th</b> | <b>25th</b> | <b>50th</b> | <b>75th</b> | <b>95th</b> | <b>99th</b> | <b>1st</b>  | <b>5th</b> | <b>25th</b> | <b>50th</b> | <b>75th</b> | <b>95th</b> | <b>99th</b> |
| <b>Population</b>                                                                  | <b>Overall</b>    | 3,938       | 7,193      | 15,917      | 32,971      | 83,762      | 430,536     | 1,206,948   | 3,933       | 7,590      | 17,758      | 38,261      | 107,850     | 557,606     | 1,454,199   |
|                                                                                    | <b>Female</b>     | 2,063       | 3,667      | 8,187       | 16,806      | 43,104      | 223,785     | 629,909     | 1,924       | 3,652      | 8,864       | 19,375      | 54,893      | 287,111     | 752,309     |
|                                                                                    | <b>Male</b>       | 1,860       | 3,502      | 7,822       | 15,880      | 40,420      | 209,697     | 571,247     | 1,937       | 3,831      | 8,969       | 19,132      | 52,699      | 271,298     | 710,507     |
|                                                                                    | <b>0-64 years</b> | 3,253       | 6,116      | 13,617      | 28,642      | 72,832      | 382,766     | 1,061,246   | 3,279       | 5,999      | 14,073      | 30,944      | 87,785      | 463,077     | 1,230,795   |
|                                                                                    | <b>65+ years</b>  | 504         | 1,000      | 2,253       | 4,343       | 10,029      | 59,557      | 170,601     | 767         | 1,514      | 3,513       | 7,058       | 18,862      | 95,459      | 238,848     |
|                                                                                    | <b>SVI 1</b>      | 5,714       | 8,296      | 20,089      | 44,540      | 99,948      | 422,723     | 961,765     | 6,059       | 8,283      | 26,738      | 55,530      | 158,038     | 589,403     | 1,149,150   |
|                                                                                    | <b>SVI 2</b>      | 4,076       | 8,052      | 16,267      | 36,330      | 115,349     | 620,730     | 1,205,773   | 3,945       | 8,610      | 17,677      | 40,074      | 141,598     | 754,613     | 1,482,558   |
|                                                                                    | <b>SVI 3</b>      | 3,425       | 5,684      | 13,552      | 23,538      | 47,740      | 239,011     | 1,215,472   | 2,690       | 6,442      | 14,288      | 26,248      | 54,557      | 263,427     | 1,584,881   |
| <b>Cancer monthly death rate (age standardized, per 1,000,000)</b>                 | <b>Overall</b>    | 75.1        | 99.1       | 122.5       | 136.6       | 150.7       | 180.4       | 210.1       | 53.7        | 71.5       | 88.0        | 100.4       | 114.1       | 138.0       | 168.2       |
|                                                                                    | <b>Female</b>     | 40.0        | 61.0       | 87.7        | 103.3       | 115.8       | 142.1       | 167.8       | 34.0        | 55.0       | 72.1        | 82.4        | 96.7        | 127.1       | 155.7       |
|                                                                                    | <b>Male</b>       | 75.0        | 111.9      | 149.4       | 168.9       | 192.7       | 238.1       | 290.9       | 49.9        | 76.6       | 100.3       | 116.2       | 133.8       | 174.8       | 208.6       |
|                                                                                    | <b>0-64 years</b> | 0.0         | 26.7       | 48.1        | 61.0        | 75.7        | 110.1       | 143.6       | 0.0         | 18.4       | 32.1        | 41.3        | 53.4        | 80.4        | 105.2       |
|                                                                                    | <b>65+ years</b>  | 210.5       | 397.0      | 643.8       | 866.1       | 1,266.6     | 1,661.7     | 2,052.4     | 239.3       | 396.1      | 562.7       | 714.4       | 909.2       | 1,197.6     | 1,521.2     |
|                                                                                    | <b>SVI 1</b>      | 76.3        | 98.5       | 120.6       | 132.3       | 145.2       | 163.1       | 195.5       | 48.5        | 67.8       | 83.1        | 92.4        | 101.7       | 122.4       | 136.1       |
|                                                                                    | <b>SVI 2</b>      | 87.7        | 100.7      | 123.5       | 137.0       | 151.6       | 176.5       | 211.6       | 66.4        | 73.8       | 89.5        | 101.2       | 113.4       | 133.0       | 160.6       |
|                                                                                    | <b>SVI 3</b>      | 72.5        | 96.2       | 124.9       | 140.9       | 157.4       | 185.5       | 211.6       | 49.6        | 76.6       | 97.6        | 109.6       | 122.9       | 152.5       | 190.3       |
| <b>Cardiovascular disease monthly death rate (age standardized, per 1,000,000)</b> | <b>Overall</b>    | 158.1       | 183.9      | 224.2       | 249.5       | 278.5       | 338.5       | 379.4       | 70.3        | 86.5       | 107.9       | 129.6       | 156.5       | 197.2       | 237.9       |
|                                                                                    | <b>Female</b>     | 95.8        | 129.4      | 164.1       | 188.3       | 214.9       | 268.1       | 319.3       | 46.7        | 60.4       | 80.7        | 98.9        | 120.7       | 165.2       | 197.1       |
|                                                                                    | <b>Male</b>       | 169.8       | 217.3      | 277.2       | 311.1       | 349.3       | 433.6       | 506.4       | 84.1        | 101.9      | 132.2       | 157.1       | 192.5       | 248.9       | 302.2       |
|                                                                                    | <b>0-64 years</b> | 0.0         | 18.9       | 38.7        | 66.8        | 97.5        | 150.6       | 193.2       | 0.0         | 11.0       | 25.1        | 42.3        | 65.3        | 108.4       | 150.4       |
|                                                                                    | <b>65+ years</b>  | 982.1       | 1,340.9    | 1,786.5     | 2,181.2     | 2,724.7     | 3,407.8     | 4,119.5     | 476.8       | 625.3      | 838.9       | 1,053.7     | 1,281.7     | 1,718.5     | 2,126.7     |

| Tropical cyclone-exposed counties                                                            |                   |       |       |       |       |       |       |       |      |       |       |       |       |       |       |
|----------------------------------------------------------------------------------------------|-------------------|-------|-------|-------|-------|-------|-------|-------|------|-------|-------|-------|-------|-------|-------|
|                                                                                              |                   | 1988  |       |       |       |       |       |       | 2018 |       |       |       |       |       |       |
| Percentile                                                                                   |                   | 1st   | 5th   | 25th  | 50th  | 75th  | 95th  | 99th  | 1st  | 5th   | 25th  | 50th  | 75th  | 95th  | 99th  |
|                                                                                              | <b>SVI 1</b>      | 167.5 | 182.9 | 214.4 | 235.0 | 257.7 | 285.9 | 308.8 | 67.6 | 76.8  | 95.0  | 109.0 | 125.6 | 150.9 | 162.6 |
|                                                                                              | <b>SVI 2</b>      | 158.2 | 182.6 | 225.0 | 249.9 | 274.2 | 324.3 | 373.1 | 75.7 | 90.3  | 111.4 | 130.4 | 152.2 | 185.7 | 224.4 |
|                                                                                              | <b>SVI 3</b>      | 152.2 | 185.8 | 240.8 | 271.4 | 303.4 | 364.8 | 397.4 | 90.9 | 106.9 | 133.1 | 156.8 | 180.2 | 228.6 | 261.9 |
| <b>Infectious and parasitic disease monthly death rate (age standardized, per 1,000,000)</b> | <b>Overall</b>    | 0.0   | 0.0   | 6.0   | 9.6   | 14.0  | 24.2  | 37.7  | 0.0  | 3.6   | 8.2   | 11.7  | 16.8  | 25.3  | 34.6  |
|                                                                                              | <b>Female</b>     | 0.0   | 0.0   | 2.9   | 6.6   | 10.6  | 20.7  | 34.1  | 0.0  | 0.0   | 6.4   | 10.0  | 14.7  | 27.0  | 38.3  |
|                                                                                              | <b>Male</b>       | 0.0   | 0.0   | 6.1   | 12.1  | 18.7  | 35.0  | 55.8  | 0.0  | 0.0   | 8.3   | 12.6  | 19.2  | 32.0  | 45.3  |
|                                                                                              | <b>0-64 years</b> | 0.0   | 0.0   | 0.0   | 3.1   | 8.6   | 22.3  | 44.1  | 0.0  | 0.0   | 0.0   | 4.9   | 9.1   | 20.5  | 33.0  |
|                                                                                              | <b>65+ years</b>  | 0.0   | 0.0   | 0.0   | 52.9  | 90.0  | 182.7 | 307.5 | 0.0  | 0.0   | 46.5  | 75.1  | 110.6 | 196.6 | 302.8 |
|                                                                                              | <b>SVI 1</b>      | 0.0   | 0.0   | 5.5   | 8.3   | 12.3  | 20.5  | 30.3  | 1.1  | 3.7   | 6.9   | 9.1   | 11.7  | 17.7  | 21.1  |
|                                                                                              | <b>SVI 2</b>      | 0.0   | 0.0   | 6.1   | 9.5   | 13.7  | 23.1  | 39.5  | 0.0  | 3.3   | 8.5   | 11.7  | 16.2  | 23.7  | 33.5  |
|                                                                                              | <b>SVI 3</b>      | 0.0   | 0.0   | 7.0   | 11.2  | 15.5  | 27.2  | 49.9  | 0.0  | 4.2   | 11.6  | 16.2  | 21.0  | 31.9  | 36.7  |
| <b>Injury monthly death rate (age standardized, per 1,000,000)</b>                           | <b>Overall</b>    | 20.9  | 29.0  | 41.8  | 55.6  | 72.2  | 103.6 | 135.9 | 14.6 | 25.2  | 41.6  | 54.3  | 68.1  | 96.9  | 129.0 |
|                                                                                              | <b>Female</b>     | 0.0   | 5.4   | 18.5  | 26.4  | 36.7  | 62.1  | 90.2  | 0.0  | 8.4   | 20.7  | 30.4  | 41.8  | 70.2  | 100.3 |
|                                                                                              | <b>Male</b>       | 19.2  | 40.7  | 60.8  | 81.3  | 108.0 | 163.8 | 213.6 | 14.1 | 32.7  | 55.8  | 75.7  | 96.3  | 138.9 | 198.2 |
|                                                                                              | <b>0-64 years</b> | 0.0   | 5.9   | 22.0  | 43.8  | 75.9  | 136.3 | 190.7 | 0.0  | 7.7   | 24.4  | 43.7  | 72.5  | 116.6 | 171.1 |
|                                                                                              | <b>65+ years</b>  | 0.0   | 0.0   | 48.4  | 90.7  | 157.2 | 302.8 | 463.0 | 0.0  | 0.0   | 58.6  | 96.6  | 148.8 | 255.8 | 392.6 |
|                                                                                              | <b>SVI 1</b>      | 15.3  | 26.3  | 35.4  | 45.0  | 57.9  | 82.2  | 109.6 | 11.6 | 23.2  | 35.6  | 46.7  | 59.2  | 74.8  | 99.9  |
|                                                                                              | <b>SVI 2</b>      | 21.7  | 30.9  | 41.9  | 53.6  | 69.9  | 99.3  | 134.4 | 15.7 | 27.4  | 44.2  | 55.4  | 68.6  | 98.9  | 127.1 |
|                                                                                              | <b>SVI 3</b>      | 23.7  | 35.5  | 53.3  | 67.3  | 83.2  | 115.0 | 144.4 | 18.6 | 30.3  | 48.2  | 60.8  | 73.8  | 104.8 | 137.4 |
| <b>Neuropsychiatric condition monthly death rate (age standardized, per 1,000,000)</b>       | <b>Overall</b>    | 0.0   | 2.6   | 9.5   | 14.0  | 18.6  | 29.4  | 40.9  | 17.6 | 28.9  | 42.9  | 52.1  | 61.8  | 79.2  | 95.3  |
|                                                                                              | <b>Female</b>     | 0.0   | 0.0   | 6.0   | 10.3  | 14.9  | 26.3  | 41.1  | 11.9 | 22.9  | 38.2  | 47.7  | 57.6  | 75.9  | 93.7  |
|                                                                                              | <b>Male</b>       | 0.0   | 0.0   | 10.1  | 16.7  | 24.0  | 41.4  | 60.6  | 9.5  | 24.9  | 43.1  | 55.2  | 68.8  | 96.1  | 119.8 |
|                                                                                              | <b>0-64 years</b> | 0.0   | 0.0   | 0.0   | 3.9   | 9.0   | 22.0  | 40.1  | 0.0  | 0.0   | 7.8   | 15.4  | 25.8  | 48.1  | 73.9  |
|                                                                                              | <b>65+ years</b>  | 0.0   | 0.0   | 49.3  | 96.3  | 150.2 | 272.4 | 384.9 | 76.8 | 199.1 | 340.7 | 423.8 | 514.6 | 687.7 | 909.6 |

| Tropical cyclone-exposed counties                                                           |                   |      |       |       |       |       |       |         |      |       |       |       |       |       |         |
|---------------------------------------------------------------------------------------------|-------------------|------|-------|-------|-------|-------|-------|---------|------|-------|-------|-------|-------|-------|---------|
|                                                                                             |                   | 1988 |       |       |       |       |       |         | 2018 |       |       |       |       |       |         |
| Percentile                                                                                  |                   | 1st  | 5th   | 25th  | 50th  | 75th  | 95th  | 99th    | 1st  | 5th   | 25th  | 50th  | 75th  | 95th  | 99th    |
|                                                                                             | <b>SVI 1</b>      | 0.0  | 4.1   | 9.6   | 13.6  | 17.7  | 27.1  | 37.2    | 21.9 | 30.1  | 43.1  | 52.2  | 60.8  | 75.4  | 87.9    |
|                                                                                             | <b>SVI 2</b>      | 0.0  | 3.0   | 10.4  | 13.9  | 18.5  | 27.6  | 40.8    | 17.6 | 28.2  | 42.4  | 51.1  | 61.5  | 79.3  | 91.4    |
|                                                                                             | <b>SVI 3</b>      | 0.0  | 0.0   | 8.5   | 14.8  | 20.2  | 33.6  | 40.5    | 11.3 | 29.6  | 43.3  | 53.1  | 63.1  | 82.7  | 98.8    |
| <b>Respiratory disease<br/>monthly death rate<br/>(age standardized,<br/>per 1,000,000)</b> | <b>Overall</b>    | 15.9 | 25.6  | 39.0  | 46.5  | 55.5  | 76.9  | 99.1    | 16.1 | 23.7  | 35.3  | 44.9  | 56.5  | 79.3  | 105.2   |
|                                                                                             | <b>Female</b>     | 0.0  | 10.3  | 22.6  | 30.3  | 37.2  | 53.0  | 75.1    | 8.3  | 18.1  | 29.8  | 38.9  | 50.8  | 78.0  | 99.1    |
|                                                                                             | <b>Male</b>       | 15.9 | 29.5  | 49.7  | 62.0  | 76.9  | 115.9 | 147.2   | 15.4 | 23.3  | 37.5  | 49.3  | 64.3  | 93.8  | 124.5   |
|                                                                                             | <b>0-64 years</b> | 0.0  | 0.0   | 4.2   | 9.9   | 16.1  | 33.4  | 51.5    | 0.0  | 0.0   | 6.4   | 11.4  | 18.2  | 36.8  | 55.7    |
|                                                                                             | <b>65+ years</b>  | 0.0  | 117.5 | 258.5 | 392.9 | 608.4 | 954.5 | 1,316.2 | 94.8 | 174.8 | 296.6 | 390.0 | 515.6 | 766.8 | 1,019.1 |
|                                                                                             | <b>SVI 1</b>      | 19.1 | 27.9  | 37.7  | 43.9  | 52.3  | 67.9  | 82.1    | 16.9 | 21.9  | 30.7  | 38.1  | 46.9  | 60.8  | 72.4    |
|                                                                                             | <b>SVI 2</b>      | 14.6 | 25.9  | 40.0  | 47.8  | 56.6  | 80.3  | 99.2    | 15.2 | 24.2  | 37.9  | 47.9  | 60.5  | 79.5  | 98.1    |
|                                                                                             | <b>SVI 3</b>      | 17.0 | 24.1  | 38.3  | 48.9  | 58.2  | 84.3  | 108.8   | 19.8 | 26.6  | 39.9  | 50.1  | 63.1  | 90.2  | 110.7   |
| <b>Temperature<br/>(annual mean, °C)</b>                                                    | <b>Overall</b>    | -6.2 | -2.6  | 7.1   | 14.9  | 22.3  | 27.1  | 28.5    | -3.5 | 0.5   | 9.6   | 16.9  | 22.1  | 27.3  | 28.6    |
|                                                                                             | <b>SVI 1</b>      | -7.7 | -4.6  | 4.1   | 11.4  | 20.3  | 26    | 27.6    | -4.8 | -1.7  | 5.2   | 14.5  | 20.4  | 25.5  | 27.9    |
|                                                                                             | <b>SVI 2</b>      | -6.1 | -2.5  | 6.9   | 14.7  | 22.1  | 27    | 28.4    | -3.5 | 0.6   | 9     | 16.7  | 21.8  | 27.2  | 28.6    |
|                                                                                             | <b>SVI 3</b>      | -1.5 | 2.8   | 10.1  | 17.3  | 24.5  | 27.5  | 29.5    | 1.9  | 6     | 13.4  | 19.6  | 24.3  | 27.8  | 29.5    |

**eTable 3.** Summary statistics by percentile of the hurricane-exposed county units used in the analysis at beginning (1988) and end (2018) of study period.

| <b>Hurricane-exposed counties</b>                                                  |                   |             |            |             |             |             |             |             |             |            |             |             |             |             |             |
|------------------------------------------------------------------------------------|-------------------|-------------|------------|-------------|-------------|-------------|-------------|-------------|-------------|------------|-------------|-------------|-------------|-------------|-------------|
|                                                                                    |                   | <b>1988</b> |            |             |             |             |             |             | <b>2018</b> |            |             |             |             |             |             |
| <b>Percentile</b>                                                                  |                   | <b>1st</b>  | <b>5th</b> | <b>25th</b> | <b>50th</b> | <b>75th</b> | <b>95th</b> | <b>99th</b> | <b>1st</b>  | <b>5th</b> | <b>25th</b> | <b>50th</b> | <b>75th</b> | <b>95th</b> | <b>99th</b> |
| <b>Population</b>                                                                  | <b>Overall</b>    | 3,562       | 6,302      | 19,539      | 41,895      | 98,590      | 433,959     | 1,525,178   | 2,999       | 6,883      | 22,156      | 53,629      | 164,230     | 615,909     | 2,313,651   |
|                                                                                    | <b>Female</b>     | 1,936       | 3,290      | 9,847       | 20,992      | 50,505      | 227,505     | 796,527     | 1,553       | 3,363      | 11,385      | 27,282      | 84,807      | 317,484     | 1,187,785   |
|                                                                                    | <b>Male</b>       | 1,626       | 3,026      | 9,503       | 20,163      | 47,819      | 206,455     | 728,651     | 1,446       | 3,459      | 10,993      | 26,932      | 79,423      | 299,382     | 1,125,867   |
|                                                                                    | <b>0-64 years</b> | 3,026       | 5,283      | 17,369      | 36,470      | 89,795      | 366,481     | 1,267,562   | 2,264       | 5,398      | 17,584      | 45,034      | 133,275     | 523,331     | 1,933,978   |
|                                                                                    | <b>65+ years</b>  | 530         | 949        | 2,391       | 5,223       | 12,196      | 76,163      | 222,848     | 738         | 1,238      | 3,916       | 9,355       | 30,736      | 138,638     | 395,912     |
|                                                                                    | <b>SVI 1</b>      | 10,136      | 12,624     | 49,408      | 87,584      | 151,545     | 282,356     | 387,643     | 9,725       | 21,150     | 63,361      | 160,661     | 225,318     | 553,547     | 598,653     |
|                                                                                    | <b>SVI 2</b>      | 2,100       | 8,300      | 22,268      | 54,202      | 174,984     | 718,428     | 1,969,578   | 1,754       | 9,760      | 23,726      | 74,362      | 318,098     | 1,433,245   | 3,312,486   |
|                                                                                    | <b>SVI 3</b>      | 3,785       | 5,392      | 14,834      | 26,289      | 59,028      | 189,358     | 773,743     | 3,798       | 6,132      | 15,970      | 32,494      | 64,926      | 285,512     | 1,227,775   |
| <b>Cancer monthly death rate (age standardized, per 1,000,000)</b>                 | <b>Overall</b>    | 66.2        | 98.4       | 125.1       | 137.8       | 150.3       | 181.4       | 194.9       | 61.3        | 73.2       | 86.7        | 96.8        | 112.8       | 130.3       | 141.6       |
|                                                                                    | <b>Female</b>     | 23.9        | 63.5       | 86.7        | 101.4       | 113.1       | 133.5       | 165.0       | 44.1        | 55.2       | 69.9        | 82.2        | 96.3        | 120.2       | 147.1       |
|                                                                                    | <b>Male</b>       | 66.3        | 122.2      | 154.0       | 172.2       | 198.1       | 244.3       | 271.8       | 41.2        | 73.6       | 100.1       | 113.4       | 130.7       | 164.1       | 181.6       |
|                                                                                    | <b>0-64 years</b> | 0.0         | 27.5       | 50.1        | 62.8        | 78.6        | 106.6       | 123.3       | 0.0         | 18.7       | 32.9        | 41.7        | 52.9        | 73.1        | 88.5        |
|                                                                                    | <b>65+ years</b>  | 209.1       | 397.2      | 621.1       | 853.8       | 1,286.2     | 1,775.2     | 2,029.1     | 233.8       | 386.7      | 532.1       | 700.3       | 879.9       | 1,186.9     | 1,500.6     |
|                                                                                    | <b>SVI 1</b>      | 111.1       | 112.9      | 125.7       | 134.9       | 153.2       | 173.8       | 180.1       | 59.3        | 72.0       | 84.1        | 87.5        | 94.4        | 102.8       | 121.6       |
|                                                                                    | <b>SVI 2</b>      | 48.1        | 100.7      | 126.7       | 140.0       | 150.9       | 173.7       | 176.1       | 61.2        | 72.8       | 86.1        | 93.0        | 108.7       | 119.3       | 129.9       |
|                                                                                    | <b>SVI 3</b>      | 69.2        | 91.6       | 123.7       | 137.6       | 149.3       | 188.4       | 204.2       | 70.2        | 76.7       | 91.5        | 105.7       | 117.6       | 138.4       | 143.9       |
| <b>Cardiovascular disease monthly death rate (age standardized, per 1,000,000)</b> | <b>Overall</b>    | 155.3       | 174.6      | 211.8       | 244.0       | 281.7       | 341.3       | 380.4       | 69.8        | 84.6       | 107.9       | 130.4       | 156.7       | 189.9       | 233.3       |
|                                                                                    | <b>Female</b>     | 103.8       | 125.3      | 161.3       | 188.5       | 219.3       | 274.5       | 326.2       | 43.9        | 57.8       | 83.5        | 99.6        | 120.8       | 158.9       | 200.2       |
|                                                                                    | <b>Male</b>       | 168.3       | 208.6      | 259.8       | 293.5       | 351.3       | 437.6       | 554.0       | 87.1        | 100.5      | 132.2       | 156.8       | 189.2       | 251.0       | 278.2       |
|                                                                                    | <b>0-64 years</b> | 0.0         | 20.5       | 40.6        | 68.4        | 98.2        | 152.6       | 185.4       | 0.0         | 12.7       | 27.3        | 44.8        | 67.2        | 109.3       | 153.5       |
|                                                                                    | <b>65+ years</b>  | 1,157.7     | 1,305.3    | 1,732.6     | 2,020.7     | 2,666.9     | 3,342.8     | 4,514.8     | 450.9       | 619.1      | 815.8       | 1,007.7     | 1,236.8     | 1,713.8     | 2,064.6     |

| Hurricane-exposed counties                                                                   |                   |       |       |       |       |       |       |       |      |       |       |       |       |       |       |
|----------------------------------------------------------------------------------------------|-------------------|-------|-------|-------|-------|-------|-------|-------|------|-------|-------|-------|-------|-------|-------|
|                                                                                              |                   | 1988  |       |       |       |       |       | 2018  |      |       |       |       |       |       |       |
| Percentile                                                                                   |                   | 1st   | 5th   | 25th  | 50th  | 75th  | 95th  | 99th  | 1st  | 5th   | 25th  | 50th  | 75th  | 95th  | 99th  |
|                                                                                              | <b>SVI 1</b>      | 168.1 | 171.3 | 199.1 | 220.7 | 235.6 | 274.7 | 300.9 | 69.2 | 72.8  | 87.8  | 107.9 | 123.4 | 134.7 | 138.6 |
|                                                                                              | <b>SVI 2</b>      | 165.2 | 175.1 | 211.6 | 243.6 | 273.7 | 347.3 | 445.6 | 72.0 | 83.7  | 105.3 | 122.6 | 140.0 | 180.8 | 188.9 |
|                                                                                              | <b>SVI 3</b>      | 150.1 | 189.7 | 223.1 | 252.4 | 299.7 | 356.9 | 377.0 | 92.8 | 98.8  | 125.5 | 149.5 | 172.4 | 210.3 | 237.8 |
| <b>Infectious and parasitic disease monthly death rate (age standardized, per 1,000,000)</b> | <b>Overall</b>    | 0.0   | 0.0   | 8.1   | 12.0  | 16.4  | 24.7  | 37.2  | 0.0  | 4.4   | 8.7   | 13.3  | 18.2  | 26.7  | 32.4  |
|                                                                                              | <b>Female</b>     | 0.0   | 0.0   | 4.0   | 8.1   | 11.6  | 19.4  | 41.1  | 0.0  | 0.0   | 7.2   | 11.0  | 15.9  | 28.2  | 39.3  |
|                                                                                              | <b>Male</b>       | 0.0   | 0.0   | 8.5   | 15.6  | 21.5  | 36.4  | 53.1  | 0.0  | 0.0   | 9.0   | 13.9  | 19.8  | 32.4  | 42.8  |
|                                                                                              | <b>0-64 years</b> | 0.0   | 0.0   | 0.0   | 5.1   | 11.5  | 28.3  | 49.3  | 0.0  | 0.0   | 3.4   | 6.2   | 10.6  | 20.4  | 27.9  |
|                                                                                              | <b>65+ years</b>  | 0.0   | 0.0   | 14.1  | 52.2  | 87.1  | 165.9 | 257.6 | 0.0  | 0.0   | 47.8  | 73.4  | 110.9 | 196.0 | 289.5 |
|                                                                                              | <b>SVI 1</b>      | 0.0   | 0.0   | 6.0   | 9.6   | 12.7  | 17.1  | 20.5  | 5.1  | 5.7   | 8.3   | 10.1  | 13.8  | 15.9  | 16.7  |
|                                                                                              | <b>SVI 2</b>      | 0.0   | 2.5   | 9.0   | 13.0  | 16.5  | 25.2  | 33.9  | 0.0  | 2.7   | 8.4   | 11.6  | 15.2  | 21.0  | 23.0  |
|                                                                                              | <b>SVI 3</b>      | 0.0   | 0.0   | 8.3   | 12.0  | 17.0  | 25.7  | 36.6  | 0.8  | 4.7   | 11.8  | 17.1  | 22.1  | 28.2  | 34.6  |
| <b>Injury monthly death rate (age standardized, per 1,000,000)</b>                           | <b>Overall</b>    | 15.8  | 29.1  | 49.4  | 63.9  | 80.2  | 106.8 | 146.8 | 18.3 | 32.8  | 45.1  | 54.5  | 63.4  | 84.2  | 111.6 |
|                                                                                              | <b>Female</b>     | 0.0   | 2.9   | 22.2  | 29.6  | 41.9  | 69.0  | 111.6 | 0.0  | 7.1   | 21.2  | 29.5  | 39.8  | 63.3  | 106.7 |
|                                                                                              | <b>Male</b>       | 4.8   | 42.6  | 73.1  | 92.1  | 124.3 | 157.2 | 226.8 | 13.0 | 41.2  | 64.1  | 76.1  | 94.2  | 124.7 | 171.8 |
|                                                                                              | <b>0-64 years</b> | 0.0   | 0.0   | 25.7  | 49.7  | 89.0  | 140.9 | 196.8 | 0.0  | 6.1   | 25.7  | 43.6  | 72.9  | 109.2 | 138.3 |
|                                                                                              | <b>65+ years</b>  | 0.0   | 0.0   | 43.7  | 87.6  | 152.4 | 275.2 | 532.1 | 0.0  | 0.0   | 60.8  | 93.0  | 140.0 | 232.8 | 312.0 |
|                                                                                              | <b>SVI 1</b>      | 14.7  | 20.4  | 36.9  | 53.6  | 63.3  | 75.5  | 83.1  | 25.6 | 33.3  | 37.8  | 49.3  | 54.6  | 63.2  | 70.1  |
|                                                                                              | <b>SVI 2</b>      | 10.7  | 37.1  | 51.3  | 58.9  | 76.4  | 89.1  | 103.9 | 14.3 | 33.0  | 43.4  | 53.2  | 62.0  | 78.1  | 84.3  |
|                                                                                              | <b>SVI 3</b>      | 23.7  | 35.1  | 55.6  | 70.0  | 84.5  | 120.5 | 160.3 | 19.1 | 32.4  | 48.0  | 57.4  | 68.5  | 99.2  | 118.4 |
| <b>Neuropsychiatric condition monthly death rate (age standardized, per 1,000,000)</b>       | <b>Overall</b>    | 0.0   | 2.3   | 9.7   | 13.8  | 18.1  | 26.6  | 45.5  | 21.1 | 28.7  | 41.3  | 50.5  | 58.9  | 72.4  | 80.4  |
|                                                                                              | <b>Female</b>     | 0.0   | 0.0   | 5.4   | 9.8   | 14.8  | 24.8  | 44.2  | 15.9 | 26.0  | 36.5  | 45.7  | 53.1  | 73.3  | 86.9  |
|                                                                                              | <b>Male</b>       | 0.0   | 0.0   | 11.2  | 16.5  | 23.7  | 38.9  | 64.1  | 10.0 | 21.3  | 43.6  | 53.3  | 64.9  | 83.6  | 103.6 |
|                                                                                              | <b>0-64 years</b> | 0.0   | 0.0   | 0.0   | 4.1   | 9.5   | 20.2  | 37.8  | 0.0  | 0.0   | 8.6   | 15.3  | 24.1  | 45.5  | 67.7  |
|                                                                                              | <b>65+ years</b>  | 0.0   | 0.0   | 40.6  | 91.2  | 145.2 | 253.6 | 376.7 | 83.3 | 198.9 | 322.8 | 412.0 | 492.1 | 651.1 | 809.4 |

| Hurricane-exposed counties                                                      |                   |      |      |       |       |       |       |         |      |       |       |       |       |       |       |
|---------------------------------------------------------------------------------|-------------------|------|------|-------|-------|-------|-------|---------|------|-------|-------|-------|-------|-------|-------|
|                                                                                 |                   | 1988 |      |       |       |       |       |         | 2018 |       |       |       |       |       |       |
| Percentile                                                                      |                   | 1st  | 5th  | 25th  | 50th  | 75th  | 95th  | 99th    | 1st  | 5th   | 25th  | 50th  | 75th  | 95th  | 99th  |
|                                                                                 | <b>SVI 1</b>      | 4.6  | 6.0  | 11.8  | 14.0  | 17.0  | 21.7  | 22.8    | 25.8 | 32.5  | 46.7  | 54.1  | 58.7  | 65.8  | 74.8  |
|                                                                                 | <b>SVI 2</b>      | 0.0  | 2.0  | 10.9  | 13.1  | 16.7  | 26.6  | 40.1    | 14.1 | 28.6  | 39.6  | 48.3  | 57.4  | 67.4  | 75.0  |
|                                                                                 | <b>SVI 3</b>      | 0.0  | 1.2  | 8.8   | 14.3  | 19.0  | 29.3  | 42.5    | 22.0 | 29.2  | 42.0  | 50.4  | 60.6  | 77.3  | 82.7  |
| <b>Respiratory disease monthly death rate (age standardized, per 1,000,000)</b> | <b>Overall</b>    | 17.8 | 24.9 | 36.2  | 43.4  | 52.6  | 66.7  | 81.8    | 11.6 | 20.9  | 31.5  | 43.2  | 53.2  | 78.7  | 105.1 |
|                                                                                 | <b>Female</b>     | 0.0  | 10.3 | 22.5  | 28.5  | 35.8  | 48.8  | 61.9    | 0.0  | 14.1  | 25.8  | 37.0  | 48.2  | 73.7  | 98.8  |
|                                                                                 | <b>Male</b>       | 17.6 | 31.2 | 46.2  | 57.1  | 70.5  | 104.0 | 119.9   | 13.6 | 21.0  | 35.0  | 45.9  | 60.6  | 85.6  | 140.9 |
|                                                                                 | <b>0-64 years</b> | 0.0  | 0.0  | 5.8   | 9.8   | 16.2  | 34.1  | 49.8    | 0.0  | 0.0   | 6.4   | 11.3  | 17.8  | 35.4  | 51.6  |
|                                                                                 | <b>65+ years</b>  | 0.0  | 96.1 | 249.0 | 357.6 | 551.9 | 874.9 | 1,071.1 | 0.0  | 141.2 | 256.7 | 353.5 | 485.0 | 690.9 | 899.9 |
|                                                                                 | <b>SVI 1</b>      | 25.6 | 29.2 | 33.4  | 36.8  | 45.3  | 58.0  | 59.1    | 18.4 | 19.9  | 28.0  | 32.9  | 42.0  | 55.6  | 61.8  |
|                                                                                 | <b>SVI 2</b>      | 9.1  | 27.8 | 39.5  | 46.2  | 54.5  | 70.2  | 95.4    | 7.1  | 18.1  | 31.1  | 43.6  | 55.9  | 73.9  | 129.1 |
|                                                                                 | <b>SVI 3</b>      | 18.3 | 24.0 | 36.7  | 43.9  | 52.0  | 66.6  | 81.3    | 12.3 | 23.9  | 35.7  | 45.3  | 59.3  | 83.4  | 97.4  |
| <b>Temperature (annual mean, °C)</b>                                            | <b>Overall</b>    | 0.6  | 6.4  | 13.1  | 19.4  | 25.6  | 27.7  | 29.3    | 1.7  | 9.5   | 15.6  | 21    | 25.5  | 28.2  | 29.2  |
|                                                                                 | <b>SVI 1</b>      | -3   | 0.7  | 10.4  | 17.6  | 23.5  | 27.5  | 28.3    | 0.4  | 1.9   | 13.5  | 19.6  | 24.4  | 27.9  | 28.5  |
|                                                                                 | <b>SVI 2</b>      | 3.1  | 7    | 14.1  | 19.8  | 25.7  | 27.8  | 29      | 7.3  | 10.8  | 16.3  | 21.3  | 25.7  | 28.4  | 29.1  |
|                                                                                 | <b>SVI 3</b>      | 3.5  | 6.9  | 13.8  | 19.7  | 25.7  | 27.7  | 29.6    | 7.4  | 10.5  | 15.9  | 21.4  | 25.7  | 28.2  | 29.4  |

**eTable 4.** Percentage change in death rates per one day increase in monthly tropical cyclone or hurricane-only exposure by cause of death, and lag time. Lag time was measured in months after tropical cyclone or hurricane. This Table accompanies Figure 2 from the main manuscript. Pneumonia-type deaths were classified as respiratory diseases.

| Wind exposure        | Cause                             | Lag (months) | Percentage change | 95% Credible Interval (CrI) |       |
|----------------------|-----------------------------------|--------------|-------------------|-----------------------------|-------|
| Hurricanes           | Cancers                           | 0            | -0.1%             | -2.4%                       | 2.3%  |
|                      |                                   | 1            | -0.5%             | -2.8%                       | 1.9%  |
|                      |                                   | 2            | -2.2%             | -4.5%                       | 0.1%  |
|                      |                                   | 3            | -0.4%             | -2.7%                       | 2.0%  |
|                      |                                   | 4            | 1.1%              | -1.2%                       | 3.5%  |
|                      |                                   | 5            | 0.9%              | -1.4%                       | 3.2%  |
|                      |                                   | 6            | 0.8%              | -1.5%                       | 3.2%  |
|                      | Cardiovascular diseases           | 0            | 4.4%              | 2.3%                        | 6.5%  |
|                      |                                   | 1            | 4.2%              | 2.2%                        | 6.3%  |
|                      |                                   | 2            | 0.8%              | -1.2%                       | 2.8%  |
|                      |                                   | 3            | 0.4%              | -1.6%                       | 2.4%  |
|                      |                                   | 4            | -0.8%             | -2.7%                       | 1.2%  |
|                      |                                   | 5            | 0.5%              | -1.4%                       | 2.4%  |
|                      |                                   | 6            | 1.1%              | -0.9%                       | 3.0%  |
|                      | Infectious and parasitic diseases | 0            | 4.3%              | -2.2%                       | 11.3% |
|                      |                                   | 1            | 7.7%              | 1.1%                        | 14.8% |
|                      |                                   | 2            | 11.4%             | 4.7%                        | 18.4% |
|                      |                                   | 3            | 1.0%              | -5.2%                       | 7.7%  |
|                      |                                   | 4            | 4.1%              | -2.1%                       | 10.8% |
|                      |                                   | 5            | -2.0%             | -8.0%                       | 4.4%  |
|                      |                                   | 6            | 2.2%              | -4.0%                       | 8.8%  |
|                      | Injuries                          | 0            | 33.4%             | 28.3%                       | 38.8% |
|                      |                                   | 1            | 8.0%              | 3.3%                        | 12.9% |
|                      |                                   | 2            | -3.4%             | -7.7%                       | 1.2%  |
|                      |                                   | 3            | 5.2%              | 0.5%                        | 10.1% |
|                      |                                   | 4            | 3.5%              | -1.2%                       | 8.4%  |
|                      |                                   | 5            | -0.5%             | -5.0%                       | 4.2%  |
|                      |                                   | 6            | 0.3%              | -4.2%                       | 5.0%  |
|                      | Neuropsychiatric conditions       | 0            | 9.9%              | 5.6%                        | 14.3% |
|                      |                                   | 1            | 9.3%              | 5.1%                        | 13.7% |
| 2                    |                                   | 6.2%         | 2.1%              | 10.4%                       |       |
| 3                    |                                   | 2.5%         | -1.5%             | 6.7%                        |       |
| 4                    |                                   | 0.2%         | -3.7%             | 4.2%                        |       |
| 5                    |                                   | -0.3%        | -4.1%             | 3.6%                        |       |
| 6                    |                                   | 0.3%         | -3.6%             | 4.3%                        |       |
| Respiratory diseases | 0                                 | 6.3%         | 2.0%              | 10.8%                       |       |



| Wind exposure     | Cause                             | Lag (months) | Percentage change | 95% Credible Interval (CrI) |       |
|-------------------|-----------------------------------|--------------|-------------------|-----------------------------|-------|
| Hurricanes        |                                   | 1            | 8.3%              | 4.0%                        | 12.7% |
|                   |                                   | 2            | 3.0%              | -1.1%                       | 7.2%  |
|                   |                                   | 3            | -1.5%             | -5.3%                       | 2.5%  |
|                   |                                   | 4            | 0.0%              | -3.7%                       | 3.9%  |
|                   |                                   | 5            | 0.3%              | -3.3%                       | 4.0%  |
|                   |                                   | 6            | -4.2%             | -7.8%                       | -0.5% |
| Tropical cyclones | Cancers                           | 0            | 0.1%              | -0.5%                       | 0.7%  |
|                   |                                   | 1            | -0.3%             | -0.9%                       | 0.3%  |
|                   |                                   | 2            | 0.0%              | -0.6%                       | 0.6%  |
|                   |                                   | 3            | 0.4%              | -0.2%                       | 1.0%  |
|                   |                                   | 4            | 0.1%              | -0.5%                       | 0.7%  |
|                   |                                   | 5            | -0.3%             | -0.9%                       | 0.3%  |
|                   | Cardiovascular diseases           | 6            | -0.2%             | -0.8%                       | 0.4%  |
|                   |                                   | 0            | 0.8%              | 0.3%                        | 1.3%  |
|                   |                                   | 1            | 1.2%              | 0.6%                        | 1.7%  |
|                   |                                   | 2            | 0.7%              | 0.2%                        | 1.2%  |
|                   |                                   | 3            | 1.1%              | 0.6%                        | 1.6%  |
|                   |                                   | 4            | 0.0%              | -0.5%                       | 0.5%  |
|                   | Infectious and parasitic diseases | 5            | 0.8%              | 0.3%                        | 1.3%  |
|                   |                                   | 6            | -0.4%             | -0.9%                       | 0.1%  |
|                   |                                   | 0            | 0.5%              | -1.2%                       | 2.3%  |
|                   |                                   | 1            | 1.8%              | 0.1%                        | 3.6%  |
|                   |                                   | 2            | 0.5%              | -1.2%                       | 2.2%  |
|                   |                                   | 3            | 0.0%              | -1.6%                       | 1.7%  |
|                   | Injuries                          | 4            | -1.7%             | -3.3%                       | 0.0%  |
|                   |                                   | 5            | 0.6%              | -1.0%                       | 2.3%  |
|                   |                                   | 6            | -1.9%             | -3.5%                       | -0.2% |
|                   |                                   | 0            | 3.4%              | 2.2%                        | 4.6%  |
|                   |                                   | 1            | 3.7%              | 2.5%                        | 4.9%  |
|                   |                                   | 2            | -0.6%             | -1.8%                       | 0.6%  |
|                   | Neuropsychiatric conditions       | 3            | 1.5%              | 0.3%                        | 2.7%  |
|                   |                                   | 4            | 1.5%              | 0.3%                        | 2.8%  |
|                   |                                   | 5            | 0.4%              | -0.8%                       | 1.7%  |
|                   |                                   | 6            | 0.9%              | -0.4%                       | 2.1%  |
|                   |                                   | 0            | 0.6%              | -0.5%                       | 1.7%  |
|                   |                                   | 1            | 1.2%              | 0.1%                        | 2.4%  |
|                   | 2                                 | 0.4%         | -0.6%             | 1.5%                        |       |
|                   | 3                                 | 1.2%         | 0.1%              | 2.2%                        |       |
|                   | 4                                 | 0.0%         | -1.0%             | 1.1%                        |       |
|                   | 5                                 | 0.1%         | -0.9%             | 1.2%                        |       |

| <b>Wind exposure</b> | <b>Cause</b>         | <b>Lag (months)</b> | <b>Percentage change</b> | <b>95% Credible Interval (CrI)</b> |       |
|----------------------|----------------------|---------------------|--------------------------|------------------------------------|-------|
| Tropical cyclones    |                      | 6                   | -0.6%                    | -1.7%                              | 0.4%  |
|                      | Respiratory diseases | 0                   | 0.0%                     | -1.1%                              | 1.1%  |
|                      |                      | 1                   | 1.3%                     | 0.2%                               | 2.4%  |
|                      |                      | 2                   | -0.2%                    | -1.2%                              | 0.9%  |
|                      |                      | 3                   | 1.3%                     | 0.4%                               | 2.4%  |
|                      |                      | 4                   | -0.8%                    | -1.8%                              | 0.1%  |
|                      |                      | 5                   | 0.4%                     | -0.5%                              | 1.3%  |
|                      |                      | 6                   | -1.8%                    | -2.7%                              | -0.8% |

**eTable 5.** Percentage change in death rates per one day increase in monthly tropical cyclone exposure by cause of death, age group (0-64 years, 65+ years), and lag time. Lag time was measured in months after tropical cyclone. This Table accompanies Figure 3 from the main manuscript. Pneumonia-type deaths were classified as respiratory diseases.

| Age group                   | Cause                             | Lag (months) | Percentage change | 95% Credible Interval (CrI) |      |
|-----------------------------|-----------------------------------|--------------|-------------------|-----------------------------|------|
| 0-64 years                  | Cancers                           | 0            | 0.8%              | -0.3%                       | 1.8% |
|                             |                                   | 1            | -0.9%             | -2.0%                       | 0.1% |
|                             |                                   | 2            | 0.7%              | -0.4%                       | 1.8% |
|                             |                                   | 3            | -0.6%             | -1.7%                       | 0.5% |
|                             |                                   | 4            | -0.1%             | -1.2%                       | 1.0% |
|                             |                                   | 5            | -0.8%             | -1.8%                       | 0.3% |
|                             |                                   | 6            | -0.4%             | -1.5%                       | 0.7% |
|                             | Cardiovascular diseases           | 0            | 0.8%              | -0.4%                       | 2.0% |
|                             |                                   | 1            | 1.0%              | -0.2%                       | 2.2% |
|                             |                                   | 2            | 0.9%              | -0.2%                       | 2.1% |
|                             |                                   | 3            | 0.6%              | -0.5%                       | 1.8% |
|                             |                                   | 4            | 0.6%              | -0.5%                       | 1.8% |
|                             |                                   | 5            | 0.9%              | -0.2%                       | 2.1% |
|                             |                                   | 6            | 0.6%              | -0.5%                       | 1.7% |
|                             | Infectious and parasitic diseases | 0            | 1.0%              | -1.4%                       | 3.4% |
|                             |                                   | 1            | 2.9%              | 0.5%                        | 5.3% |
|                             |                                   | 2            | 2.0%              | -0.4%                       | 4.4% |
|                             |                                   | 3            | 2.3%              | -0.1%                       | 4.7% |
|                             |                                   | 4            | 0.6%              | -1.7%                       | 2.9% |
|                             |                                   | 5            | 1.9%              | -0.4%                       | 4.3% |
|                             |                                   | 6            | -1.4%             | -3.7%                       | 0.9% |
|                             | Injuries                          | 0            | 2.5%              | 1.1%                        | 3.9% |
|                             |                                   | 1            | 2.7%              | 1.3%                        | 4.2% |
|                             |                                   | 2            | -0.7%             | -2.1%                       | 0.7% |
|                             |                                   | 3            | 1.0%              | -0.4%                       | 2.5% |
|                             |                                   | 4            | 2.2%              | 0.7%                        | 3.7% |
|                             |                                   | 5            | 0.7%              | -0.7%                       | 2.2% |
|                             |                                   | 6            | 1.1%              | -0.4%                       | 2.5% |
| Neuropsychiatric conditions | 0                                 | -0.7%        | -3.2%             | 1.8%                        |      |
|                             | 1                                 | 1.9%         | -0.6%             | 4.5%                        |      |
|                             | 2                                 | 1.5%         | -0.9%             | 4.1%                        |      |
|                             | 3                                 | 1.4%         | -1.1%             | 3.9%                        |      |
|                             | 4                                 | 0.0%         | -2.5%             | 2.5%                        |      |
|                             | 5                                 | 0.7%         | -1.7%             | 3.2%                        |      |
|                             | 6                                 | -1.7%        | -4.1%             | 0.8%                        |      |
| Respiratory diseases        | 0                                 | -2.0%        | -4.7%             | 0.6%                        |      |

| Age group                   | Cause                             | Lag (months) | Percentage change | 95% Credible Interval (CrI) |       |
|-----------------------------|-----------------------------------|--------------|-------------------|-----------------------------|-------|
|                             |                                   | 1            | 0.7%              | -1.9%                       | 3.4%  |
|                             |                                   | 2            | 0.9%              | -1.6%                       | 3.5%  |
|                             |                                   | 3            | 2.0%              | -0.4%                       | 4.5%  |
|                             |                                   | 4            | -0.9%             | -3.2%                       | 1.5%  |
|                             |                                   | 5            | 1.0%              | -1.3%                       | 3.4%  |
|                             |                                   | 6            | -1.1%             | -3.4%                       | 1.3%  |
| 65+ years                   | Cancers                           | 0            | -0.1%             | -0.8%                       | 0.6%  |
|                             |                                   | 1            | 0.0%              | -0.7%                       | 0.7%  |
|                             |                                   | 2            | -0.2%             | -0.9%                       | 0.5%  |
|                             |                                   | 3            | 1.0%              | 0.3%                        | 1.7%  |
|                             |                                   | 4            | 0.5%              | -0.2%                       | 1.2%  |
|                             |                                   | 5            | 0.3%              | -0.4%                       | 1.0%  |
|                             | Cardiovascular diseases           | 6            | 0.2%              | -0.5%                       | 0.9%  |
|                             |                                   | 0            | 1.0%              | 0.4%                        | 1.5%  |
|                             |                                   | 1            | 1.3%              | 0.8%                        | 1.9%  |
|                             |                                   | 2            | 0.9%              | 0.3%                        | 1.4%  |
|                             |                                   | 3            | 1.6%              | 1.0%                        | 2.1%  |
|                             |                                   | 4            | 0.3%              | -0.2%                       | 0.9%  |
|                             | Infectious and parasitic diseases | 5            | 1.2%              | 0.6%                        | 1.7%  |
|                             |                                   | 6            | -0.2%             | -0.7%                       | 0.3%  |
|                             |                                   | 0            | 1.5%              | -0.9%                       | 3.9%  |
|                             |                                   | 1            | 2.0%              | -0.3%                       | 4.4%  |
|                             |                                   | 2            | 0.3%              | -1.9%                       | 2.6%  |
|                             |                                   | 3            | -0.4%             | -2.6%                       | 1.9%  |
|                             | Injuries                          | 4            | -2.3%             | -4.4%                       | -0.1% |
|                             |                                   | 5            | 0.8%              | -1.3%                       | 3.1%  |
|                             |                                   | 6            | -0.6%             | -2.8%                       | 1.6%  |
|                             |                                   | 0            | 6.2%              | 3.9%                        | 8.5%  |
|                             |                                   | 1            | 6.4%              | 4.2%                        | 8.7%  |
|                             |                                   | 2            | 0.0%              | -2.1%                       | 2.2%  |
| Neuropsychiatric conditions | 3                                 | 3.0%         | 0.8%              | 5.2%                        |       |
|                             | 4                                 | 0.3%         | -1.9%             | 2.5%                        |       |
|                             | 5                                 | 0.1%         | -2.0%             | 2.3%                        |       |
|                             | 6                                 | 0.4%         | -1.7%             | 2.7%                        |       |
|                             | 0                                 | 0.9%         | -0.3%             | 2.2%                        |       |
|                             | 1                                 | 1.1%         | -0.1%             | 2.3%                        |       |
|                             |                                   | 2            | 0.2%              | -1.0%                       | 1.4%  |
|                             |                                   | 3            | 1.3%              | 0.2%                        | 2.5%  |
|                             |                                   | 4            | 0.4%              | -0.7%                       | 1.6%  |
|                             |                                   | 5            | 0.4%              | -0.7%                       | 1.6%  |

| <b>Age group</b> | <b>Cause</b>         | <b>Lag (months)</b> | <b>Percentage change</b> | <b>95% Credible Interval (CrI)</b> |       |
|------------------|----------------------|---------------------|--------------------------|------------------------------------|-------|
|                  | Respiratory diseases | 6                   | 0.0%                     | -1.2%                              | 1.1%  |
|                  |                      | 0                   | 0.4%                     | -0.8%                              | 1.6%  |
|                  |                      | 1                   | 1.5%                     | 0.3%                               | 2.6%  |
|                  |                      | 2                   | -0.3%                    | -1.4%                              | 0.8%  |
|                  |                      | 3                   | 1.5%                     | 0.5%                               | 2.6%  |
|                  |                      | 4                   | -0.4%                    | -1.4%                              | 0.6%  |
|                  |                      | 5                   | 0.7%                     | -0.2%                              | 1.7%  |
|                  |                      | 6                   | -1.5%                    | -2.5%                              | -0.5% |

**eTable 6.** Percentage change in death rates per one day increase in monthly tropical cyclone exposure by cause of death, social vulnerability tertiles, and lag time. The first tertile (SVI 1) represents lowest social vulnerability and the third tertile (SVI 3) represents highest social vulnerability. Lag time was measured in months after tropical cyclone. This Table accompanies Figure 4 from the main manuscript. Pneumonia-type deaths were classified as respiratory diseases.

| SVI                         | Cause                             | Lag (months) | Percentage change | 95% Credible Interval (CrI) |       |
|-----------------------------|-----------------------------------|--------------|-------------------|-----------------------------|-------|
| SVI 1                       | Cancers                           | 0            | 0.2%              | -0.9%                       | 1.4%  |
|                             |                                   | 1            | 0.2%              | -0.9%                       | 1.4%  |
|                             |                                   | 2            | 0.8%              | -0.3%                       | 2.0%  |
|                             |                                   | 3            | 1.3%              | 0.1%                        | 2.5%  |
|                             |                                   | 4            | 0.3%              | -0.8%                       | 1.5%  |
|                             |                                   | 5            | 0.7%              | -0.4%                       | 1.9%  |
|                             |                                   | 6            | -0.4%             | -1.6%                       | 0.7%  |
|                             | Cardiovascular diseases           | 0            | 1.4%              | 0.3%                        | 2.5%  |
|                             |                                   | 1            | 1.2%              | 0.1%                        | 2.2%  |
|                             |                                   | 2            | 0.6%              | -0.4%                       | 1.7%  |
|                             |                                   | 3            | 1.7%              | 0.7%                        | 2.7%  |
|                             |                                   | 4            | 0.5%              | -0.5%                       | 1.5%  |
|                             |                                   | 5            | 1.4%              | 0.4%                        | 2.4%  |
|                             |                                   | 6            | -0.3%             | -1.2%                       | 0.7%  |
|                             | Infectious and parasitic diseases | 0            | 0.8%              | -2.8%                       | 4.4%  |
|                             |                                   | 1            | 1.5%              | -2.0%                       | 5.2%  |
|                             |                                   | 2            | -1.0%             | -4.4%                       | 2.6%  |
|                             |                                   | 3            | -2.0%             | -5.4%                       | 1.4%  |
|                             |                                   | 4            | -2.0%             | -5.3%                       | 1.4%  |
|                             |                                   | 5            | -3.9%             | -7.1%                       | -0.6% |
|                             |                                   | 6            | -1.0%             | -4.3%                       | 2.4%  |
|                             | Injuries                          | 0            | 0.7%              | -1.7%                       | 3.1%  |
|                             |                                   | 1            | 2.6%              | 0.1%                        | 5.0%  |
|                             |                                   | 2            | 0.9%              | -1.5%                       | 3.4%  |
|                             |                                   | 3            | 3.0%              | 0.5%                        | 5.5%  |
|                             |                                   | 4            | 3.3%              | 0.8%                        | 5.9%  |
|                             |                                   | 5            | 0.3%              | -2.2%                       | 2.8%  |
| 6                           |                                   | 1.0%         | -1.5%             | 3.6%                        |       |
| Neuropsychiatric conditions | 0                                 | -1.7%        | -3.7%             | 0.4%                        |       |
|                             | 1                                 | 1.1%         | -0.9%             | 3.2%                        |       |
|                             | 2                                 | 0.1%         | -1.8%             | 2.1%                        |       |
|                             | 3                                 | 1.5%         | -0.5%             | 3.5%                        |       |
|                             | 4                                 | -0.8%        | -2.7%             | 1.2%                        |       |
|                             | 5                                 | 0.4%         | -1.6%             | 2.3%                        |       |

| SVI                         | Cause                             | Lag (months) | Percentage change | 95% Credible Interval (CrI) |       |
|-----------------------------|-----------------------------------|--------------|-------------------|-----------------------------|-------|
| SVI 1                       | Respiratory diseases              | 6            | -1.4%             | -3.3%                       | 0.6%  |
|                             |                                   | 0            | -1.0%             | -3.0%                       | 1.1%  |
|                             |                                   | 1            | 0.6%              | -1.4%                       | 2.7%  |
|                             |                                   | 2            | -1.6%             | -3.6%                       | 0.3%  |
|                             |                                   | 3            | 0.8%              | -1.1%                       | 2.7%  |
|                             |                                   | 4            | -1.4%             | -3.2%                       | 0.4%  |
|                             |                                   | 5            | 0.5%              | -1.3%                       | 2.2%  |
|                             |                                   | 6            | -1.1%             | -2.9%                       | 0.7%  |
| SVI 2                       | Cancers                           | 0            | 0.1%              | -0.8%                       | 1.0%  |
|                             |                                   | 1            | -0.7%             | -1.6%                       | 0.2%  |
|                             |                                   | 2            | -0.5%             | -1.3%                       | 0.4%  |
|                             |                                   | 3            | -0.1%             | -1.0%                       | 0.8%  |
|                             |                                   | 4            | 0.4%              | -0.5%                       | 1.3%  |
|                             |                                   | 5            | -1.0%             | -1.9%                       | -0.1% |
|                             |                                   | 6            | -0.3%             | -1.2%                       | 0.6%  |
|                             | Cardiovascular diseases           | 0            | 0.7%              | 0.0%                        | 1.6%  |
|                             |                                   | 1            | 1.5%              | 0.7%                        | 2.2%  |
|                             |                                   | 2            | 0.5%              | -0.3%                       | 1.3%  |
|                             |                                   | 3            | 0.8%              | 0.1%                        | 1.6%  |
|                             |                                   | 4            | -0.2%             | -0.9%                       | 0.5%  |
|                             |                                   | 5            | 0.5%              | -0.2%                       | 1.3%  |
|                             |                                   | 6            | -0.6%             | -1.3%                       | 0.2%  |
|                             | Infectious and parasitic diseases | 0            | 0.7%              | -1.9%                       | 3.4%  |
|                             |                                   | 1            | 1.9%              | -0.7%                       | 4.5%  |
|                             |                                   | 2            | 1.0%              | -1.6%                       | 3.6%  |
|                             |                                   | 3            | 0.5%              | -2.0%                       | 3.1%  |
|                             |                                   | 4            | -0.4%             | -2.9%                       | 2.1%  |
|                             |                                   | 5            | 2.2%              | -0.3%                       | 4.7%  |
|                             |                                   | 6            | -2.1%             | -4.5%                       | 0.4%  |
|                             | Injuries                          | 0            | 5.8%              | 4.0%                        | 7.6%  |
|                             |                                   | 1            | 3.9%              | 2.1%                        | 5.7%  |
|                             |                                   | 2            | 0.1%              | -1.6%                       | 1.9%  |
| 3                           |                                   | 0.8%         | -1.0%             | 2.6%                        |       |
| 4                           |                                   | 2.1%         | 0.3%              | 4.0%                        |       |
| 5                           |                                   | 0.5%         | -1.2%             | 2.4%                        |       |
| 6                           |                                   | 2.1%         | 0.3%              | 3.9%                        |       |
| Neuropsychiatric conditions | 0                                 | 2.8%         | 1.2%              | 4.5%                        |       |
|                             | 1                                 | 1.3%         | -0.3%             | 3.0%                        |       |
|                             | 2                                 | 1.4%         | -0.2%             | 3.0%                        |       |
|                             | 3                                 | 1.3%         | -0.2%             | 3.0%                        |       |

| SVI                         | Cause                             | Lag (months) | Percentage change | 95% Credible Interval (CrI) |       |
|-----------------------------|-----------------------------------|--------------|-------------------|-----------------------------|-------|
| SVI 2                       |                                   | 4            | 1.3%              | -0.3%                       | 2.9%  |
|                             |                                   | 5            | 0.0%              | -1.5%                       | 1.6%  |
|                             |                                   | 6            | 0.3%              | -1.3%                       | 1.9%  |
|                             | Respiratory diseases              | 0            | 0.8%              | -0.8%                       | 2.5%  |
|                             |                                   | 1            | 1.9%              | 0.2%                        | 3.5%  |
|                             |                                   | 2            | -0.1%             | -1.6%                       | 1.5%  |
|                             |                                   | 3            | 0.8%              | -0.7%                       | 2.3%  |
|                             |                                   | 4            | -0.5%             | -1.9%                       | 0.9%  |
|                             |                                   | 5            | 0.0%              | -1.4%                       | 1.4%  |
|                             | 6                                 | -1.9%        | -3.2%             | -0.5%                       |       |
| SVI 3                       | Cancers                           | 0            | 0.1%              | -1.1%                       | 1.4%  |
|                             |                                   | 1            | -0.1%             | -1.3%                       | 1.1%  |
|                             |                                   | 2            | 0.1%              | -1.1%                       | 1.4%  |
|                             |                                   | 3            | 0.7%              | -0.6%                       | 1.9%  |
|                             |                                   | 4            | -0.4%             | -1.6%                       | 0.8%  |
|                             |                                   | 5            | 0.2%              | -1.0%                       | 1.4%  |
|                             |                                   | 6            | 0.1%              | -1.1%                       | 1.3%  |
|                             | Cardiovascular diseases           | 0            | 0.2%              | -0.8%                       | 1.3%  |
|                             |                                   | 1            | 0.6%              | -0.4%                       | 1.6%  |
|                             |                                   | 2            | 1.0%              | 0.0%                        | 2.0%  |
|                             |                                   | 3            | 1.0%              | 0.0%                        | 2.0%  |
|                             |                                   | 4            | -0.1%             | -1.0%                       | 0.9%  |
|                             |                                   | 5            | 0.5%              | -0.5%                       | 1.5%  |
|                             |                                   | 6            | -0.3%             | -1.3%                       | 0.7%  |
|                             | Infectious and parasitic diseases | 0            | 1.1%              | -2.0%                       | 4.4%  |
|                             |                                   | 1            | 2.6%              | -0.5%                       | 5.8%  |
|                             |                                   | 2            | 1.5%              | -1.6%                       | 4.7%  |
|                             |                                   | 3            | 1.1%              | -1.9%                       | 4.2%  |
|                             |                                   | 4            | -3.1%             | -6.0%                       | -0.1% |
|                             |                                   | 5            | 2.2%              | -0.9%                       | 5.3%  |
|                             |                                   | 6            | -1.3%             | -4.3%                       | 1.8%  |
|                             | Injuries                          | 0            | 3.0%              | 0.7%                        | 5.3%  |
|                             |                                   | 1            | 5.5%              | 3.1%                        | 7.8%  |
|                             |                                   | 2            | -2.0%             | -4.2%                       | 0.3%  |
| 3                           |                                   | 2.2%         | -0.2%             | 4.6%                        |       |
| 4                           |                                   | -0.7%        | -3.0%             | 1.7%                        |       |
| 5                           |                                   | 0.5%         | -1.8%             | 2.9%                        |       |
| 6                           |                                   | -1.1%        | -3.4%             | 1.3%                        |       |
| Neuropsychiatric conditions | 0                                 | -1.4%        | -3.5%             | 0.8%                        |       |
|                             | 1                                 | 0.4%         | -1.7%             | 2.6%                        |       |



| <b>SVI</b> | <b>Cause</b>         | <b>Lag (months)</b> | <b>Percentage change</b> | <b>95% Credible Interval (CrI)</b> |       |
|------------|----------------------|---------------------|--------------------------|------------------------------------|-------|
| SVI<br>3   |                      | 2                   | -1.6%                    | -3.6%                              | 0.6%  |
|            |                      | 3                   | -0.2%                    | -2.3%                              | 2.0%  |
|            |                      | 4                   | -1.7%                    | -3.8%                              | 0.5%  |
|            |                      | 5                   | -0.3%                    | -2.4%                              | 1.8%  |
|            |                      | 6                   | -1.7%                    | -3.8%                              | 0.5%  |
|            | Respiratory diseases | 0                   | -0.5%                    | -2.6%                              | 1.6%  |
|            |                      | 1                   | 1.0%                     | -1.0%                              | 3.2%  |
|            |                      | 2                   | 1.4%                     | -0.7%                              | 3.4%  |
|            |                      | 3                   | 3.0%                     | 1.1%                               | 5.0%  |
|            |                      | 4                   | -0.8%                    | -2.6%                              | 1.1%  |
|            |                      | 5                   | 0.8%                     | -1.1%                              | 2.6%  |
|            |                      | 6                   | -2.4%                    | -4.3%                              | -0.6% |

**eTable 7.** Posterior probability for cancers that one effect estimate was larger than another, using comparisons of 1,000 draws the posterior marginal distribution of each effect estimate.

| Wind exposure     | Comparison                       | Lag (months) | Posterior probability |
|-------------------|----------------------------------|--------------|-----------------------|
| All               | Hurricanes><br>Tropical cyclones | 0            | 0.40                  |
|                   |                                  | 1            | 0.39                  |
|                   |                                  | 2            | 0.05                  |
|                   |                                  | 3            | 0.28                  |
|                   |                                  | 4            | 0.61                  |
|                   |                                  | 5            | 0.86                  |
|                   |                                  | 6            | 0.83                  |
| Hurricanes        | Female>Male                      | 0            | 0.58                  |
|                   |                                  | 1            | 0.65                  |
|                   |                                  | 2            | 0.31                  |
|                   |                                  | 3            | 0.93                  |
|                   |                                  | 4            | 0.12                  |
|                   |                                  | 5            | 0.42                  |
|                   |                                  | 6            | 0.96                  |
|                   | Older>Younger                    | 0            | 0.29                  |
|                   |                                  | 1            | 0.46                  |
|                   |                                  | 2            | 0.57                  |
|                   |                                  | 3            | 0.76                  |
|                   |                                  | 4            | 0.49                  |
|                   |                                  | 5            | 0.49                  |
|                   |                                  | 6            | 0.70                  |
|                   | SVI 3>SVI 1                      | 0            | 0.39                  |
| 1                 |                                  | >0.99        |                       |
| 2                 |                                  | 0.73         |                       |
| 3                 |                                  | 0.94         |                       |
| 4                 |                                  | 0.97         |                       |
| 5                 |                                  | 0.89         |                       |
| 6                 |                                  | 0.64         |                       |
| Tropical cyclones | Female>Male                      | 0            | 0.36                  |
|                   |                                  | 1            | 0.49                  |
|                   |                                  | 2            | 0.78                  |
|                   |                                  | 3            | 0.58                  |
|                   |                                  | 4            | 0.55                  |
|                   |                                  | 5            | 0.08                  |
|                   |                                  | 6            | 0.41                  |
|                   | Older>Younger                    | 0            | 0.04                  |
|                   |                                  | 1            | 0.71                  |
|                   |                                  | 2            | 0.03                  |

| <b>Wind exposure</b> | <b>Comparison</b> | <b>Lag (months)</b> | <b>Posterior probability</b> |
|----------------------|-------------------|---------------------|------------------------------|
| Tropical cyclones    | Older>Younger     | 3                   | 0.92                         |
|                      |                   | 4                   | 0.61                         |
|                      |                   | 5                   | 0.89                         |
|                      |                   | 6                   | 0.62                         |
|                      | SVI 3>SVI 1       | 0                   | 0.44                         |
|                      |                   | 1                   | 0.34                         |
|                      |                   | 2                   | 0.14                         |
|                      |                   | 3                   | 0.18                         |
|                      |                   | 4                   | 0.24                         |
|                      |                   | 5                   | 0.22                         |
|                      |                   | 6                   | 0.76                         |

**eTable 8.** Posterior probability for cardiovascular diseases that one effect estimate was larger than another, using comparisons of 1,000 draws the posterior marginal distribution of each effect estimate.

| Wind exposure     | Comparison                       | Lag (months) | Posterior probability |
|-------------------|----------------------------------|--------------|-----------------------|
| All               | Hurricanes><br>Tropical cyclones | 0            | >0.99                 |
|                   |                                  | 1            | >0.99                 |
|                   |                                  | 2            | 0.61                  |
|                   |                                  | 3            | 0.35                  |
|                   |                                  | 4            | 0.15                  |
|                   |                                  | 5            | 0.39                  |
|                   |                                  | 6            | 0.70                  |
| Hurricanes        | Female>Male                      | 0            | 0.20                  |
|                   |                                  | 1            | 0.44                  |
|                   |                                  | 2            | 0.61                  |
|                   |                                  | 3            | 0.09                  |
|                   |                                  | 4            | 0.31                  |
|                   |                                  | 5            | 0.49                  |
|                   |                                  | 6            | 0.78                  |
|                   | Older>Younger                    | 0            | 0.12                  |
|                   |                                  | 1            | 0.96                  |
|                   |                                  | 2            | 0.70                  |
|                   |                                  | 3            | 0.84                  |
|                   |                                  | 4            | 0.03                  |
|                   |                                  | 5            | 0.52                  |
|                   |                                  | 6            | 0.39                  |
|                   | SVI 3>SVI 1                      | 0            | 0.65                  |
|                   |                                  | 1            | 0.21                  |
|                   |                                  | 2            | 0.73                  |
|                   |                                  | 3            | 0.70                  |
| 4                 |                                  | 0.99         |                       |
| 5                 |                                  | 0.43         |                       |
| 6                 |                                  | >0.99        |                       |
| Tropical cyclones | Female>Male                      | 0            | 0.46                  |
|                   |                                  | 1            | 0.93                  |
|                   |                                  | 2            | 0.12                  |
|                   |                                  | 3            | 0.29                  |
|                   |                                  | 4            | 0.34                  |
|                   |                                  | 5            | 0.52                  |
|                   |                                  | 6            | 0.07                  |
|                   | Older>Younger                    | 0            | 0.65                  |
|                   |                                  | 1            | 0.62                  |

| Wind exposure | Comparison    | Lag (months) | Posterior probability |
|---------------|---------------|--------------|-----------------------|
|               | Older>Younger | 2            | 0.55                  |
|               |               | 3            | 0.84                  |
|               |               | 4            | 0.31                  |
|               |               | 5            | 0.72                  |
|               |               | 6            | 0.11                  |
|               | SVI 3>SVI 1   | 0            | 0.14                  |
|               |               | 1            | 0.16                  |
|               |               | 2            | 0.65                  |
|               |               | 3            | 0.14                  |
|               |               | 4            | 0.20                  |
|               |               | 5            | 0.13                  |
|               |               | 6            | 0.48                  |

**eTable 9.** Posterior probability for infectious and parasitic diseases that one effect estimate was larger than another, using comparisons of 1,000 draws the posterior marginal distribution of each effect estimate.

| Wind exposure     | Comparison                       | Lag (months) | Posterior probability |
|-------------------|----------------------------------|--------------|-----------------------|
| All               | Hurricanes><br>Tropical cyclones | 0            | 0.86                  |
|                   |                                  | 1            | 0.95                  |
|                   |                                  | 2            | >0.99                 |
|                   |                                  | 3            | 0.66                  |
|                   |                                  | 4            | 0.92                  |
|                   |                                  | 5            | 0.24                  |
|                   |                                  | 6            | 0.89                  |
| Hurricanes        | Female>Male                      | 0            | 0.10                  |
|                   |                                  | 1            | 0.75                  |
|                   |                                  | 2            | 0.19                  |
|                   |                                  | 3            | 0.17                  |
|                   |                                  | 4            | 0.86                  |
|                   |                                  | 5            | 0.50                  |
|                   |                                  | 6            | 0.50                  |
|                   | Older>Younger                    | 0            | 0.98                  |
|                   |                                  | 1            | 0.62                  |
|                   |                                  | 2            | 0.98                  |
|                   |                                  | 3            | 0.01                  |
|                   |                                  | 4            | 0.64                  |
|                   |                                  | 5            | 0.83                  |
|                   |                                  | 6            | 0.37                  |
|                   | SVI 3>SVI 1                      | 0            | 0.12                  |
|                   |                                  | 1            | 0.88                  |
|                   |                                  | 2            | 0.80                  |
|                   |                                  | 3            | 0.94                  |
| 4                 |                                  | 0.92         |                       |
| 5                 |                                  | 0.98         |                       |
| 6                 |                                  | 0.95         |                       |
| Tropical cyclones | Female>Male                      | 0            | 0.31                  |
|                   |                                  | 1            | 0.19                  |
|                   |                                  | 2            | 0.55                  |
|                   |                                  | 3            | 0.56                  |
|                   |                                  | 4            | 0.10                  |
|                   |                                  | 5            | 0.83                  |
|                   |                                  | 6            | 0.61                  |
|                   | Older>Younger                    | 0            | 0.60                  |
|                   |                                  | 1            | 0.32                  |

| <b>Wind exposure</b> | <b>Comparison</b> | <b>Lag (months)</b> | <b>Posterior probability</b> |
|----------------------|-------------------|---------------------|------------------------------|
|                      | Older>Younger     | 2                   | 0.13                         |
|                      |                   | 3                   | 0.08                         |
|                      |                   | 4                   | 0.08                         |
|                      |                   | 5                   | 0.24                         |
|                      |                   | 6                   | 0.62                         |
|                      | SVI 3>SVI 1       | 0                   | 0.54                         |
|                      |                   | 1                   | 0.71                         |
|                      |                   | 2                   | 0.78                         |
|                      |                   | 3                   | 0.81                         |
|                      |                   | 4                   | 0.40                         |
|                      |                   | 5                   | 0.98                         |
|                      |                   | 6                   | 0.48                         |

**eTable 10.** Posterior probability for injuries that one effect estimate was larger than another, using comparisons of 1,000 draws the posterior marginal distribution of each effect estimate.

| Wind exposure     | Comparison                       | Lag (months) | Posterior probability |
|-------------------|----------------------------------|--------------|-----------------------|
| All               | Hurricanes><br>Tropical cyclones | 0            | >0.99                 |
|                   |                                  | 1            | 0.95                  |
|                   |                                  | 2            | 0.14                  |
|                   |                                  | 3            | 0.94                  |
|                   |                                  | 4            | 0.85                  |
|                   |                                  | 5            | 0.39                  |
|                   |                                  | 6            | 0.44                  |
| Hurricanes        | Female>Male                      | 0            | >0.99                 |
|                   |                                  | 1            | 0.9                   |
|                   |                                  | 2            | 0.44                  |
|                   |                                  | 3            | 0.94                  |
|                   |                                  | 4            | 0.28                  |
|                   |                                  | 5            | 0.46                  |
|                   |                                  | 6            | 0.2                   |
|                   | Older>Younger                    | 0            | >0.99                 |
|                   |                                  | 1            | 0.92                  |
|                   |                                  | 2            | 0.88                  |
|                   |                                  | 3            | >0.99                 |
|                   |                                  | 4            | 0.98                  |
|                   |                                  | 5            | 0.83                  |
|                   |                                  | 6            | 0.78                  |
|                   | SVI 3>SVI 1                      | 0            | >0.99                 |
| 1                 |                                  | 0.33         |                       |
| 2                 |                                  | 0.14         |                       |
| 3                 |                                  | 0.25         |                       |
| 4                 |                                  | 0.3          |                       |
| 5                 |                                  | 0.46         |                       |
| 6                 |                                  | 0.27         |                       |
| Tropical cyclones | Female>Male                      | 0            | 0.86                  |
|                   |                                  | 1            | 0.59                  |
|                   |                                  | 2            | 0.77                  |
|                   |                                  | 3            | 0.98                  |
|                   |                                  | 4            | 0.57                  |
|                   |                                  | 5            | 0.04                  |
|                   |                                  | 6            | 0.06                  |
|                   | Older>Younger                    | 0            | >0.99                 |
|                   |                                  | 1            | >0.99                 |
|                   |                                  | 2            | 0.65                  |



| Wind exposure | Comparison    | Lag (months) | Posterior probability |
|---------------|---------------|--------------|-----------------------|
|               | Older>Younger | 3            | 0.88                  |
|               |               | 4            | 0.16                  |
|               |               | 5            | 0.21                  |
|               |               | 6            | 0.19                  |
|               | SVI 3>SVI 1   | 0            | 0.88                  |
|               |               | 1            | 0.96                  |
|               |               | 2            | 0.01                  |
|               |               | 3            | 0.26                  |
|               |               | 4            | <0.01                 |
|               |               | 5            | 0.44                  |
|               |               | 6            | 0.04                  |

**eTable 11.** Posterior probability for neuropsychiatric conditions that one effect estimate was larger than another, using comparisons of 1,000 draws the posterior marginal distribution of each effect estimate.

| Wind exposure     | Comparison                       | Lag (months) | Posterior probability |
|-------------------|----------------------------------|--------------|-----------------------|
| All               | Hurricanes><br>Tropical cyclones | 0            | >0.99                 |
|                   |                                  | 1            | >0.99                 |
|                   |                                  | 2            | >0.99                 |
|                   |                                  | 3            | 0.83                  |
|                   |                                  | 4            | 0.51                  |
|                   |                                  | 5            | 0.48                  |
|                   |                                  | 6            | 0.74                  |
| Hurricanes        | Female>Male                      | 0            | 0.55                  |
|                   |                                  | 1            | 0.55                  |
|                   |                                  | 2            | 0.74                  |
|                   |                                  | 3            | 0.42                  |
|                   |                                  | 4            | 0.09                  |
|                   |                                  | 5            | 0.6                   |
|                   |                                  | 6            | 0.58                  |
|                   | Older>Younger                    | 0            | 0.56                  |
|                   |                                  | 1            | 0.37                  |
|                   |                                  | 2            | 0.41                  |
|                   |                                  | 3            | 0.91                  |
|                   |                                  | 4            | 0.62                  |
|                   |                                  | 5            | 0.02                  |
|                   |                                  | 6            | 0.05                  |
|                   | SVI 3>SVI 1                      | 0            | 0.5                   |
|                   |                                  | 1            | 0.91                  |
|                   |                                  | 2            | 0.22                  |
|                   |                                  | 3            | 0.28                  |
| 4                 |                                  | 0.83         |                       |
| 5                 |                                  | 0.88         |                       |
| 6                 |                                  | 0.87         |                       |
| Tropical cyclones | Female>Male                      | 0            | 0.86                  |
|                   |                                  | 1            | 0.06                  |
|                   |                                  | 2            | 0.25                  |
|                   |                                  | 3            | 0.91                  |
|                   |                                  | 4            | 0.41                  |
|                   |                                  | 5            | 0.21                  |
|                   |                                  | 6            | 0.97                  |
|                   | Older>Younger                    | 0            | 0.71                  |
|                   |                                  | 1            | 0.19                  |

| <b>Wind exposure</b> | <b>Comparison</b> | <b>Lag (months)</b> | <b>Posterior probability</b> |
|----------------------|-------------------|---------------------|------------------------------|
|                      | Older>Younger     | 2                   | 0.09                         |
|                      |                   | 3                   | 0.49                         |
|                      |                   | 4                   | 0.61                         |
|                      |                   | 5                   | 0.21                         |
|                      |                   | 6                   | 0.71                         |
|                      | SVI 3>SVI 1       | 0                   | 0.62                         |
|                      |                   | 1                   | 0.3                          |
|                      |                   | 2                   | 0.13                         |
|                      |                   | 3                   | 0.12                         |
|                      |                   | 4                   | 0.18                         |
|                      |                   | 5                   | 0.26                         |
|                      |                   | 6                   | 0.4                          |

**eTable 12.** Posterior probability for respiratory diseases that one effect estimate was larger than another, using comparisons of 1,000 draws the posterior marginal distribution of each effect estimate.

| Wind exposure     | Comparison                       | Lag (months) | Posterior probability |
|-------------------|----------------------------------|--------------|-----------------------|
| All               | Hurricanes><br>Tropical cyclones | 0            | >0.99                 |
|                   |                                  | 1            | >0.99                 |
|                   |                                  | 2            | 0.92                  |
|                   |                                  | 3            | 0.11                  |
|                   |                                  | 4            | 0.66                  |
|                   |                                  | 5            | 0.49                  |
|                   |                                  | 6            | 0.09                  |
| Hurricanes        | Female>Male                      | 0            | 0.88                  |
|                   |                                  | 1            | 0.38                  |
|                   |                                  | 2            | 0.72                  |
|                   |                                  | 3            | 0.56                  |
|                   |                                  | 4            | 0.81                  |
|                   |                                  | 5            | 0.28                  |
|                   |                                  | 6            | 0.88                  |
|                   | Older>Younger                    | 0            | 0.88                  |
|                   |                                  | 1            | 0.46                  |
|                   |                                  | 2            | 0.92                  |
|                   |                                  | 3            | 0.15                  |
|                   |                                  | 4            | 0.71                  |
|                   |                                  | 5            | 0.28                  |
|                   |                                  | 6            | 0.17                  |
|                   | SVI 3>SVI 1                      | 0            | 0.35                  |
|                   |                                  | 1            | 0.69                  |
|                   |                                  | 2            | 0.29                  |
|                   |                                  | 3            | 0.49                  |
| 4                 |                                  | 0.19         |                       |
| 5                 |                                  | 0.62         |                       |
| 6                 |                                  | 0.83         |                       |
| Tropical cyclones | Female>Male                      | 0            | 0.09                  |
|                   |                                  | 1            | 0.12                  |
|                   |                                  | 2            | 0.22                  |
|                   |                                  | 3            | 0.10                  |
|                   |                                  | 4            | 0.10                  |
|                   |                                  | 5            | 0.91                  |
|                   |                                  | 6            | 0.93                  |
|                   | Older>Younger                    | 0            | 0.90                  |
|                   |                                  | 1            | 0.70                  |

| <b>Wind exposure</b> | <b>Comparison</b> | <b>Lag (months)</b> | <b>Posterior probability</b> |
|----------------------|-------------------|---------------------|------------------------------|
|                      | Older>Younger     | 2                   | 0.18                         |
|                      |                   | 3                   | 0.38                         |
|                      |                   | 4                   | 0.58                         |
|                      |                   | 5                   | 0.36                         |
|                      |                   | 6                   | 0.26                         |
|                      | SVI 3>SVI 1       | 0                   | 0.6                          |
|                      |                   | 1                   | 0.64                         |
|                      |                   | 2                   | 0.98                         |
|                      |                   | 3                   | 0.94                         |
|                      |                   | 4                   | 0.7                          |
|                      |                   | 5                   | 0.51                         |
|                      |                   | 6                   | 0.12                         |

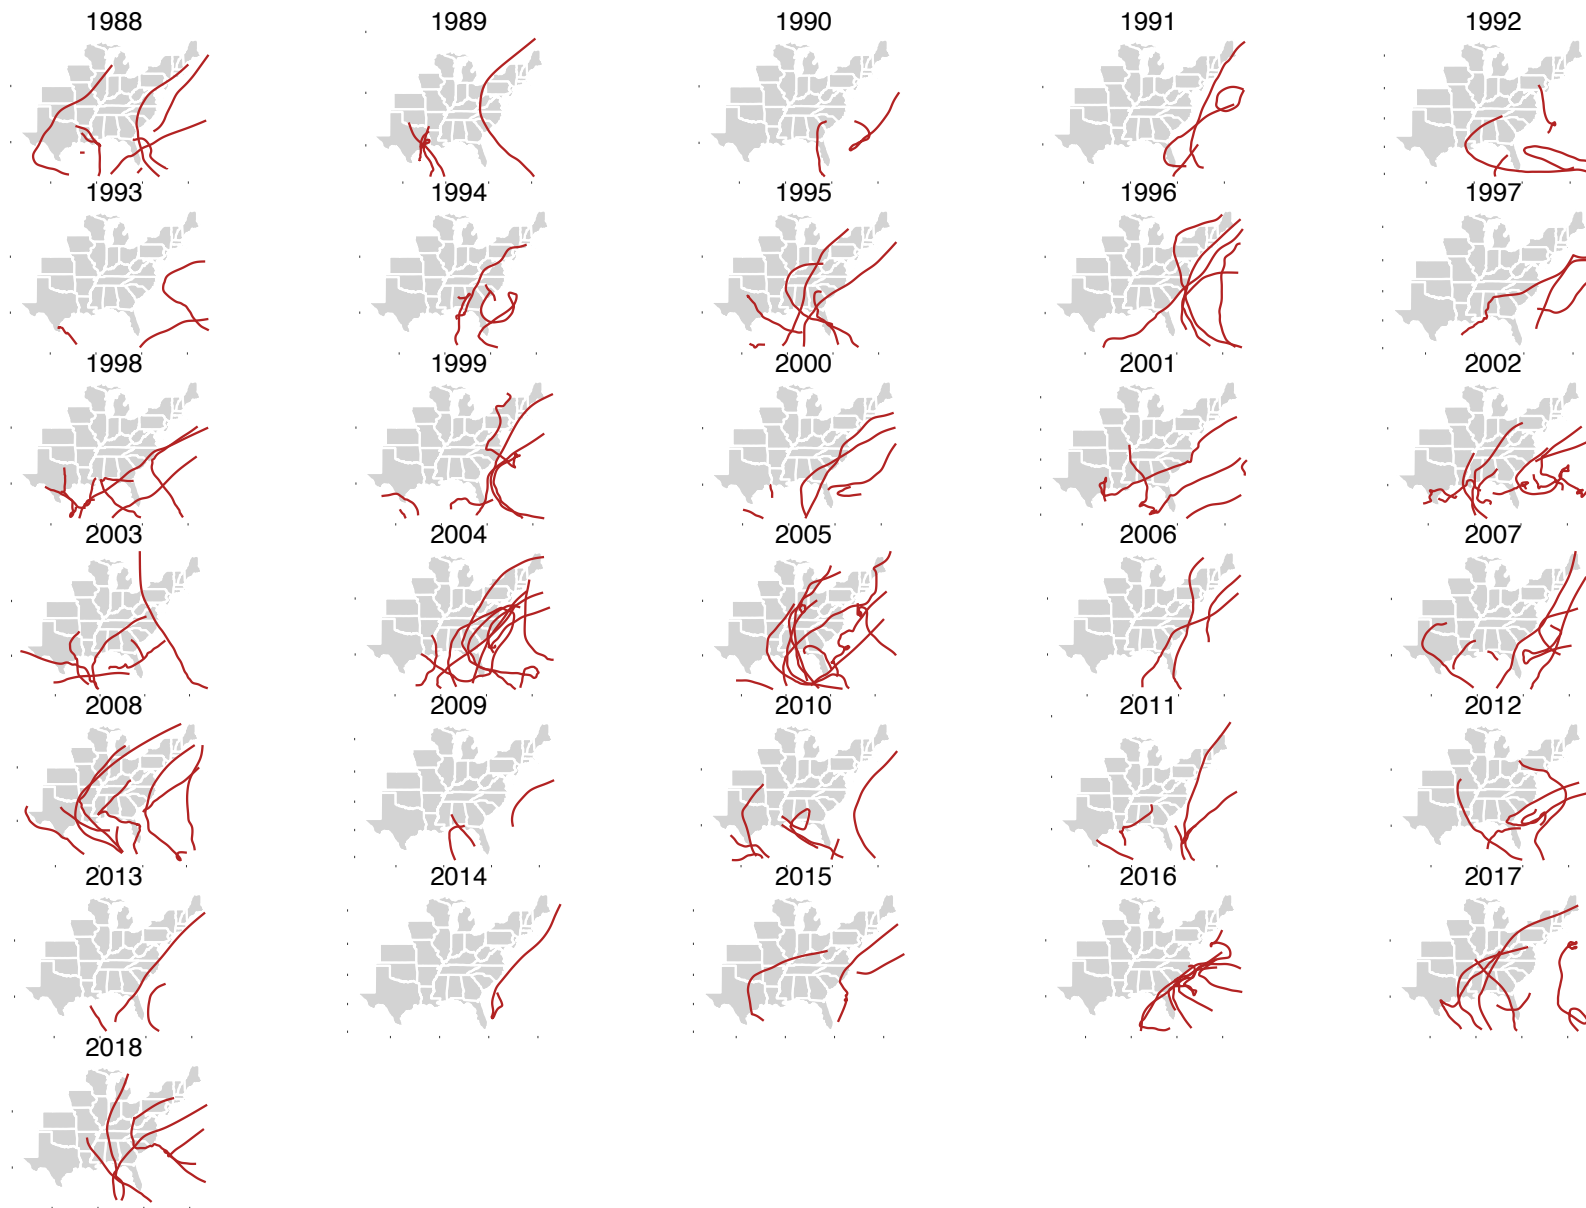

**eFigure 1.** Best-track routes of each tropical cyclone listed in Table 1 in main paper by year, 1980 – 2018.

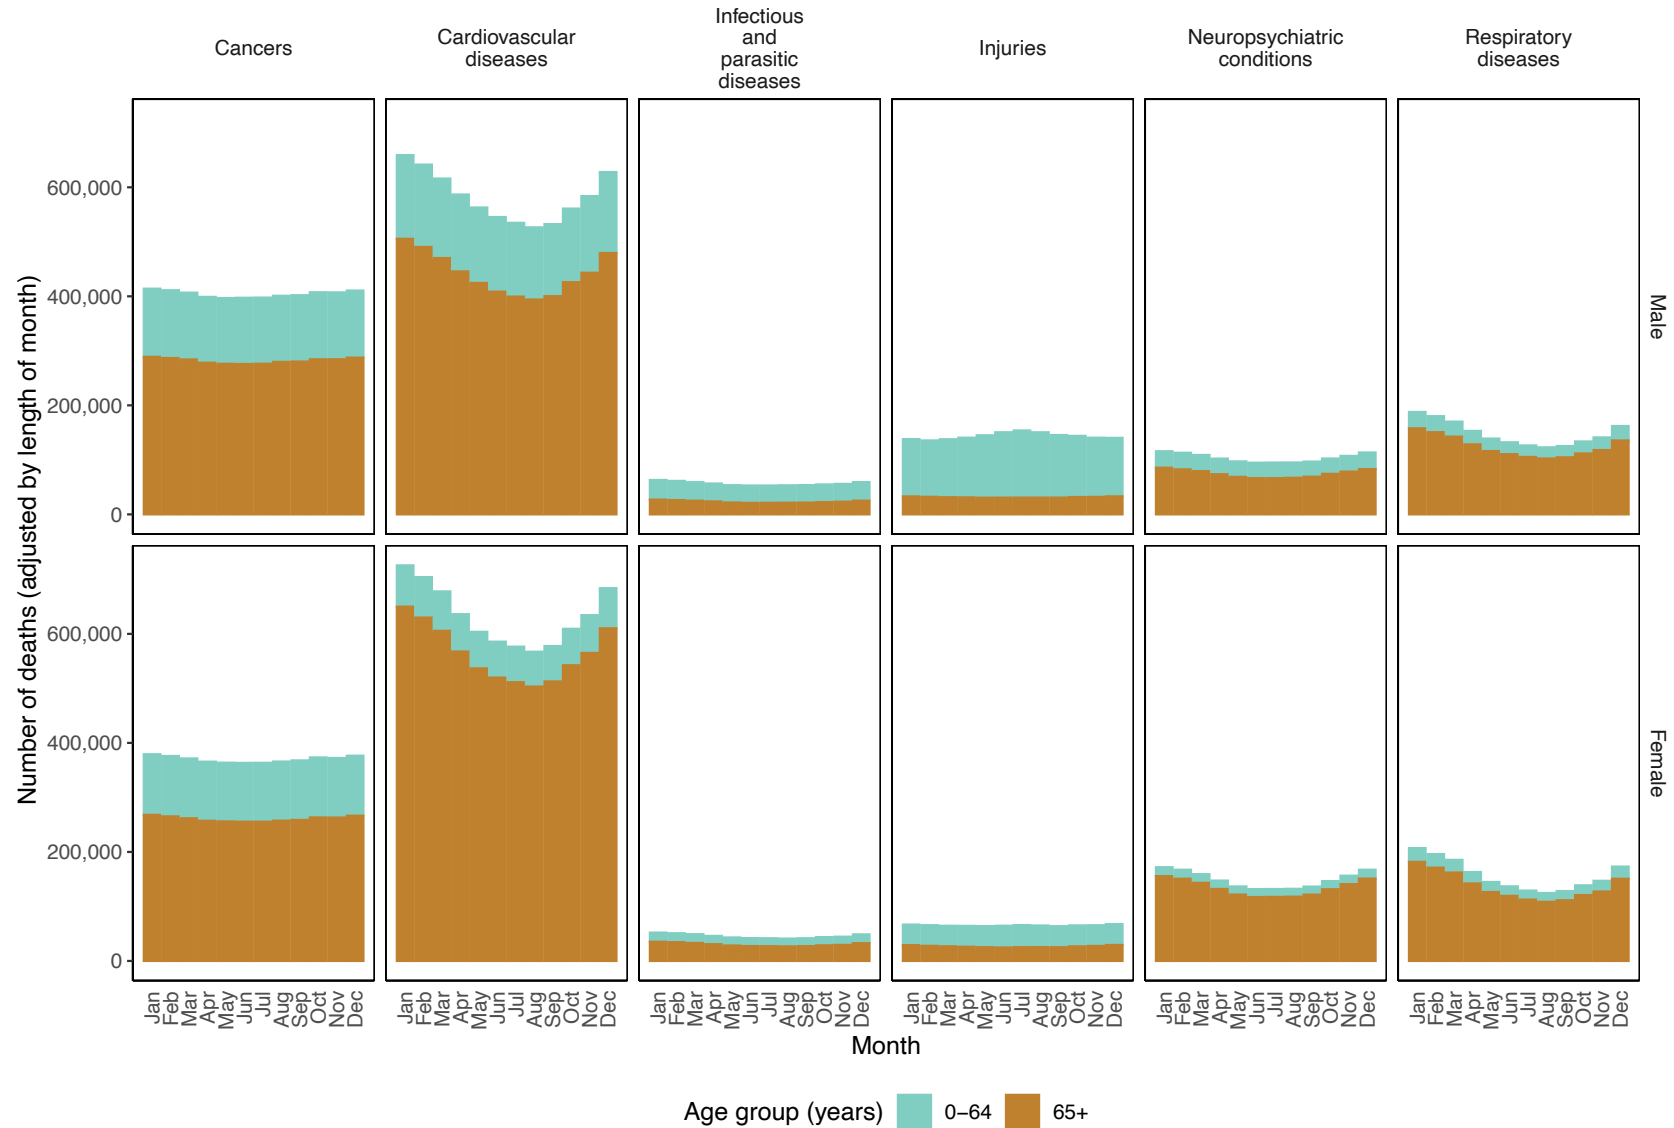

**eFigure 2.** Number of deaths by cause, month, sex, and age group (0-64 years, 65+ years) in counties exposed to tropical cyclones in the United States for 1988 – 2018. The values in the plot represent the total counts of deaths in any county with at least one tropical cyclone exposure (n=33,619,393). Pneumonia-type deaths were classified as respiratory diseases.

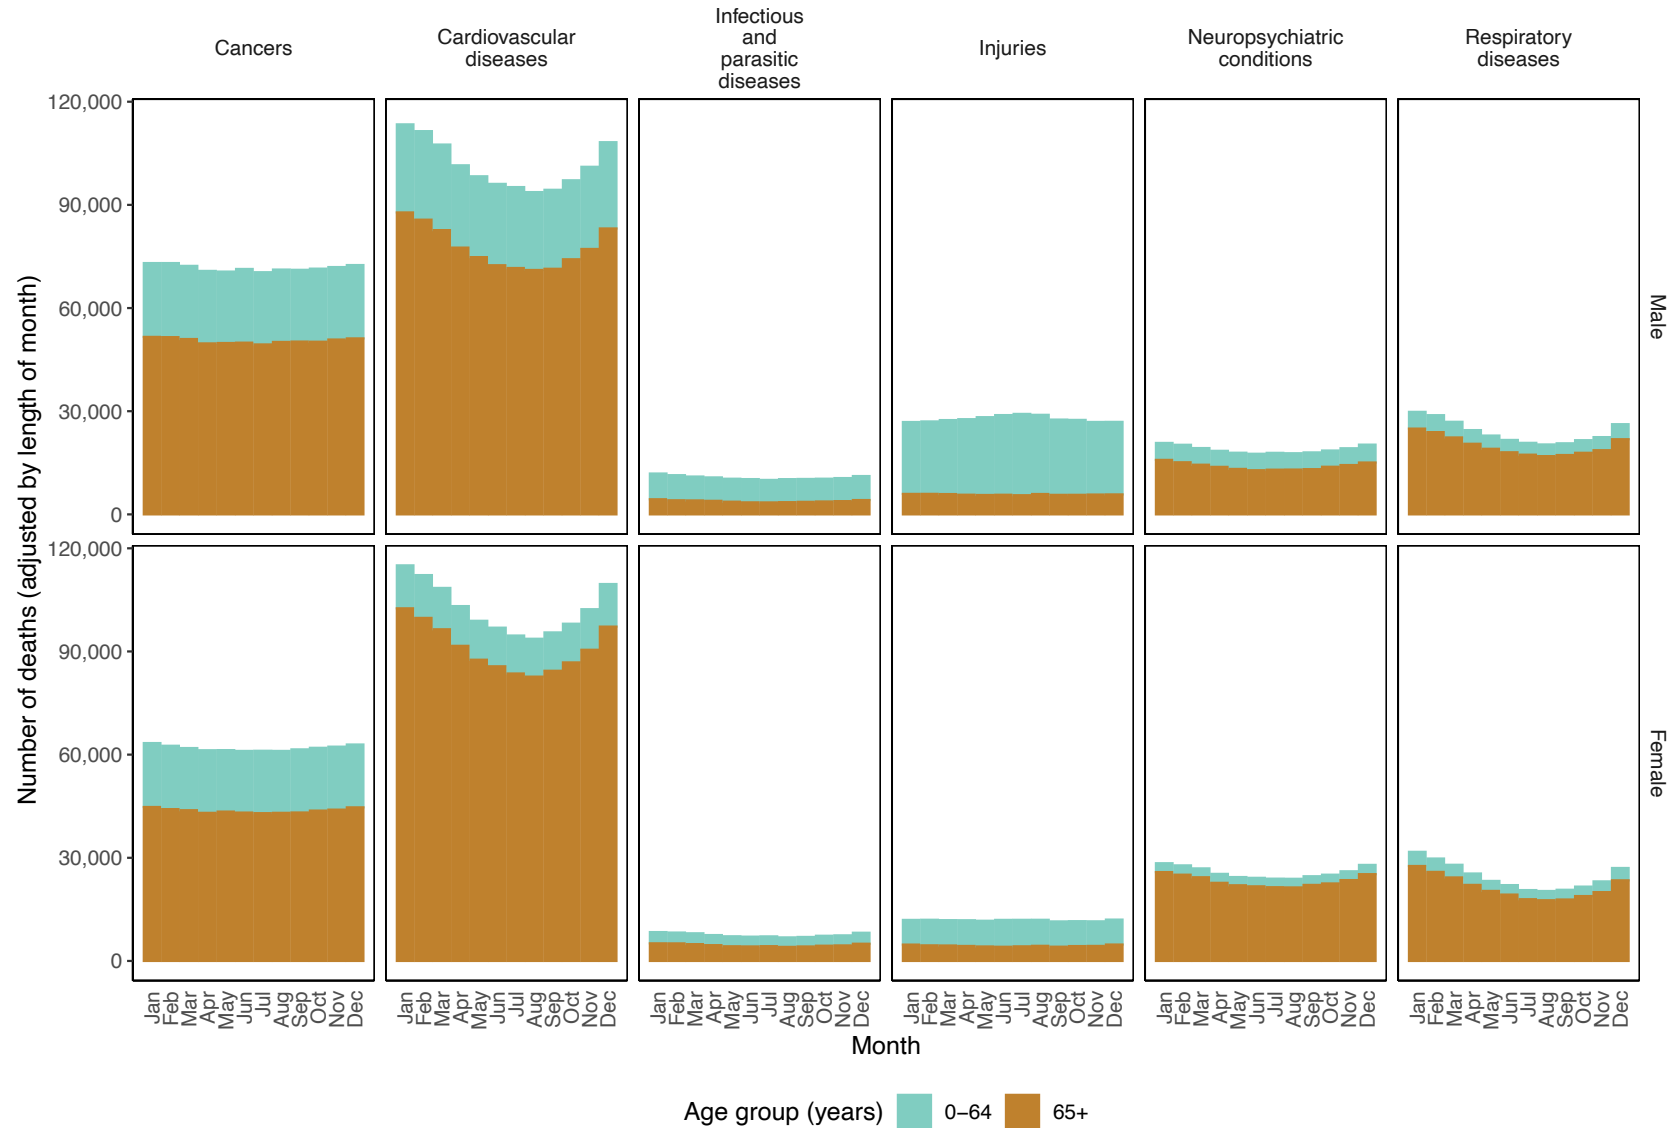

**eFigure 3.** Number of deaths by cause, month, sex, and age group (0-64 years, 65+ years) in counties exposed to hurricanes in the United States for 1988 – 2018. The values in the plot represent the total counts of deaths in any county with at least one hurricane exposure (n=5,749,787). Pneumonia-type deaths are classified as respiratory diseases.



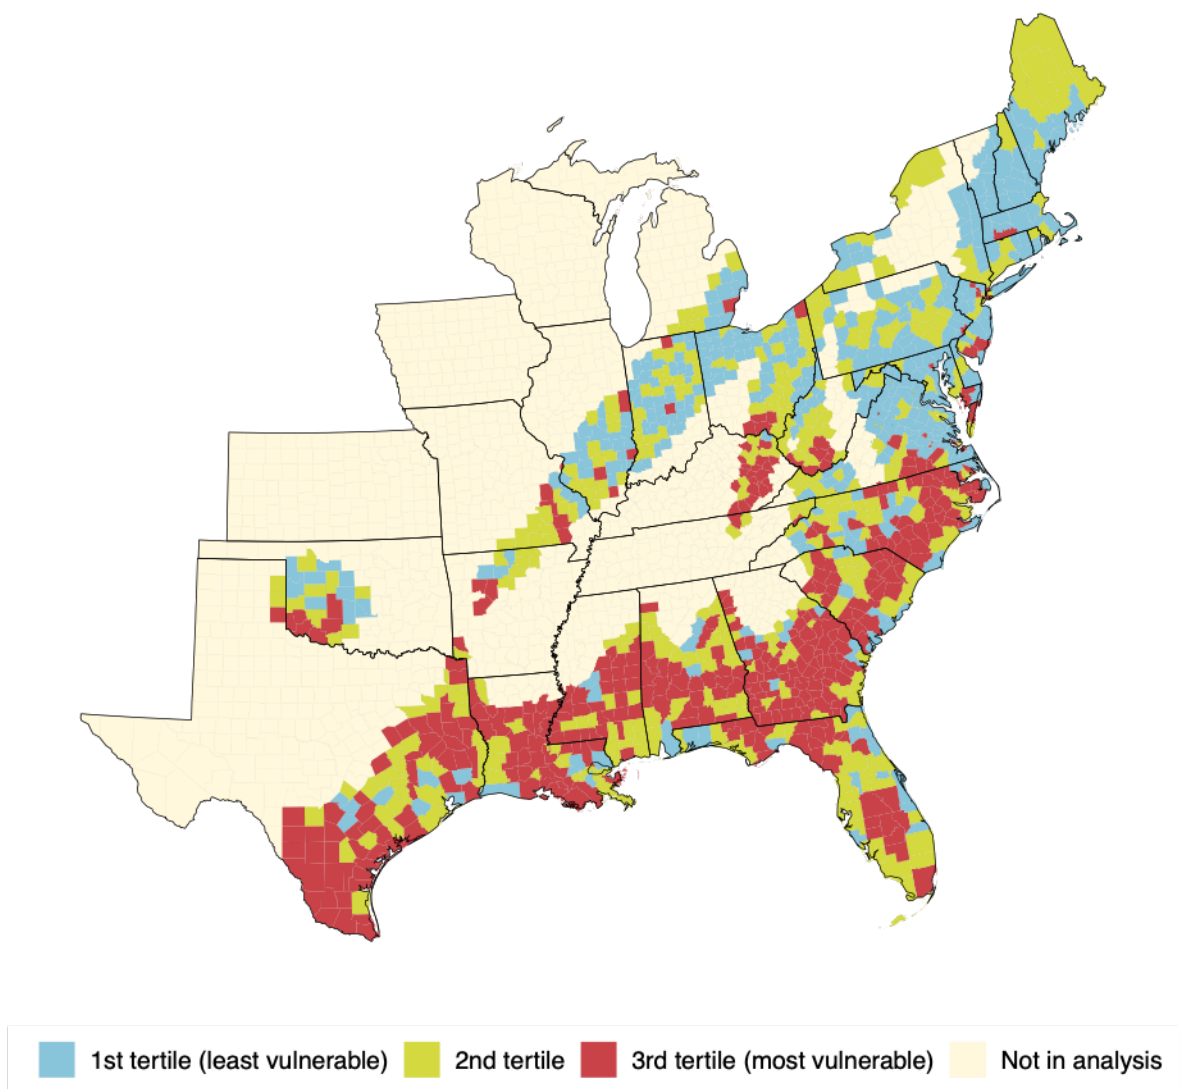

**eFigure 4.** 2018 Social Vulnerability Index (SVI) tertiles for included counties (n=1,206). The range is from 1 (least vulnerable) to 3 (most vulnerable).

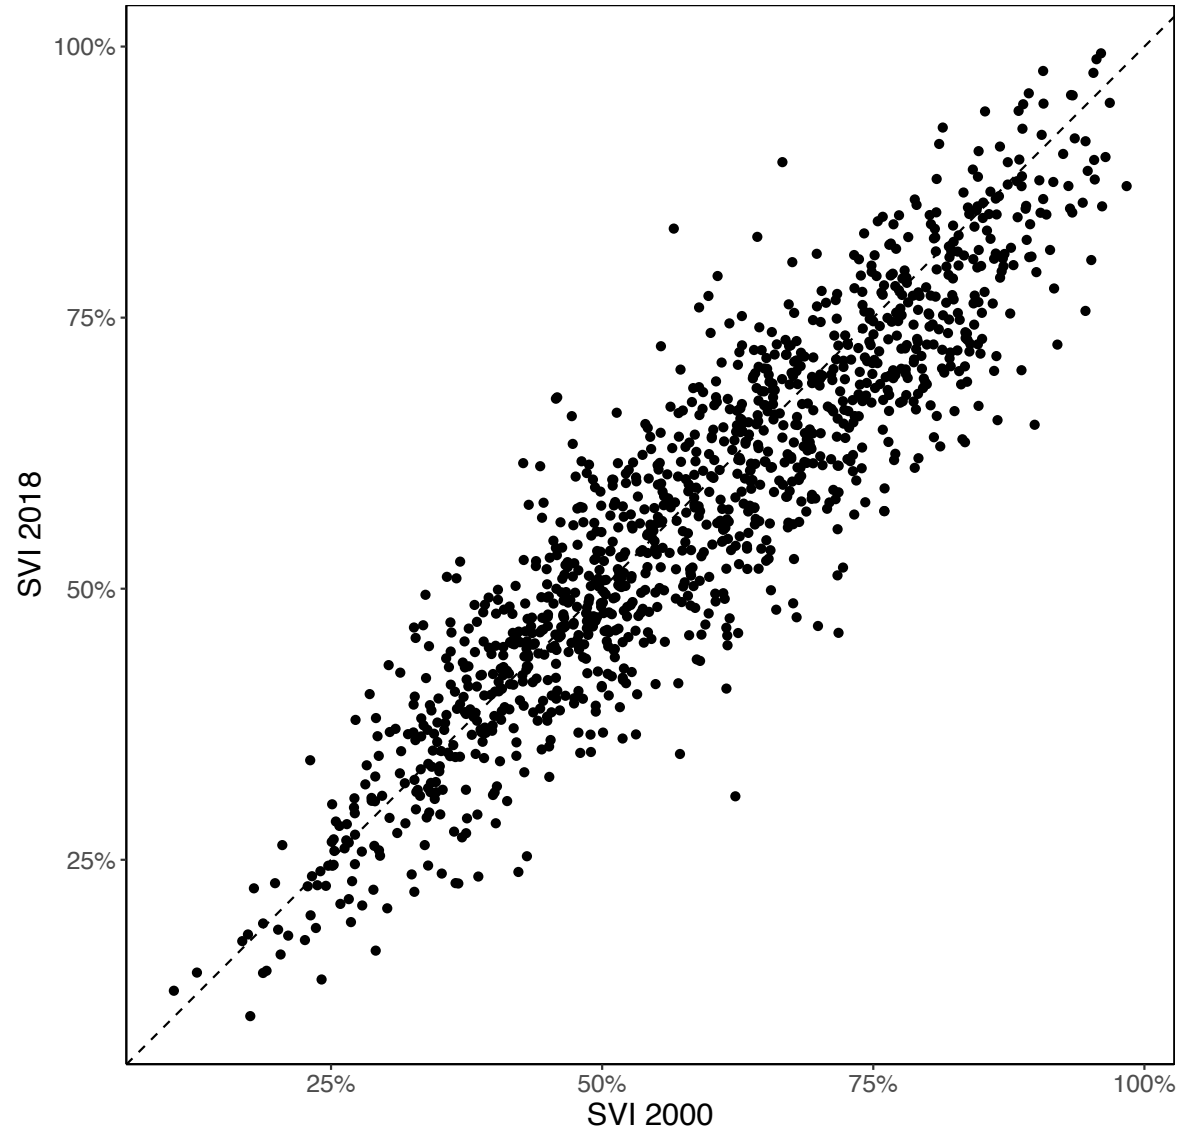

**eFigure 5.** Comparison of Social Vulnerability Index (SVI) percentiles for 2000 and 2018 for included counties (n=1,206). The range is from 0% (least vulnerable) to 100% (most vulnerable).

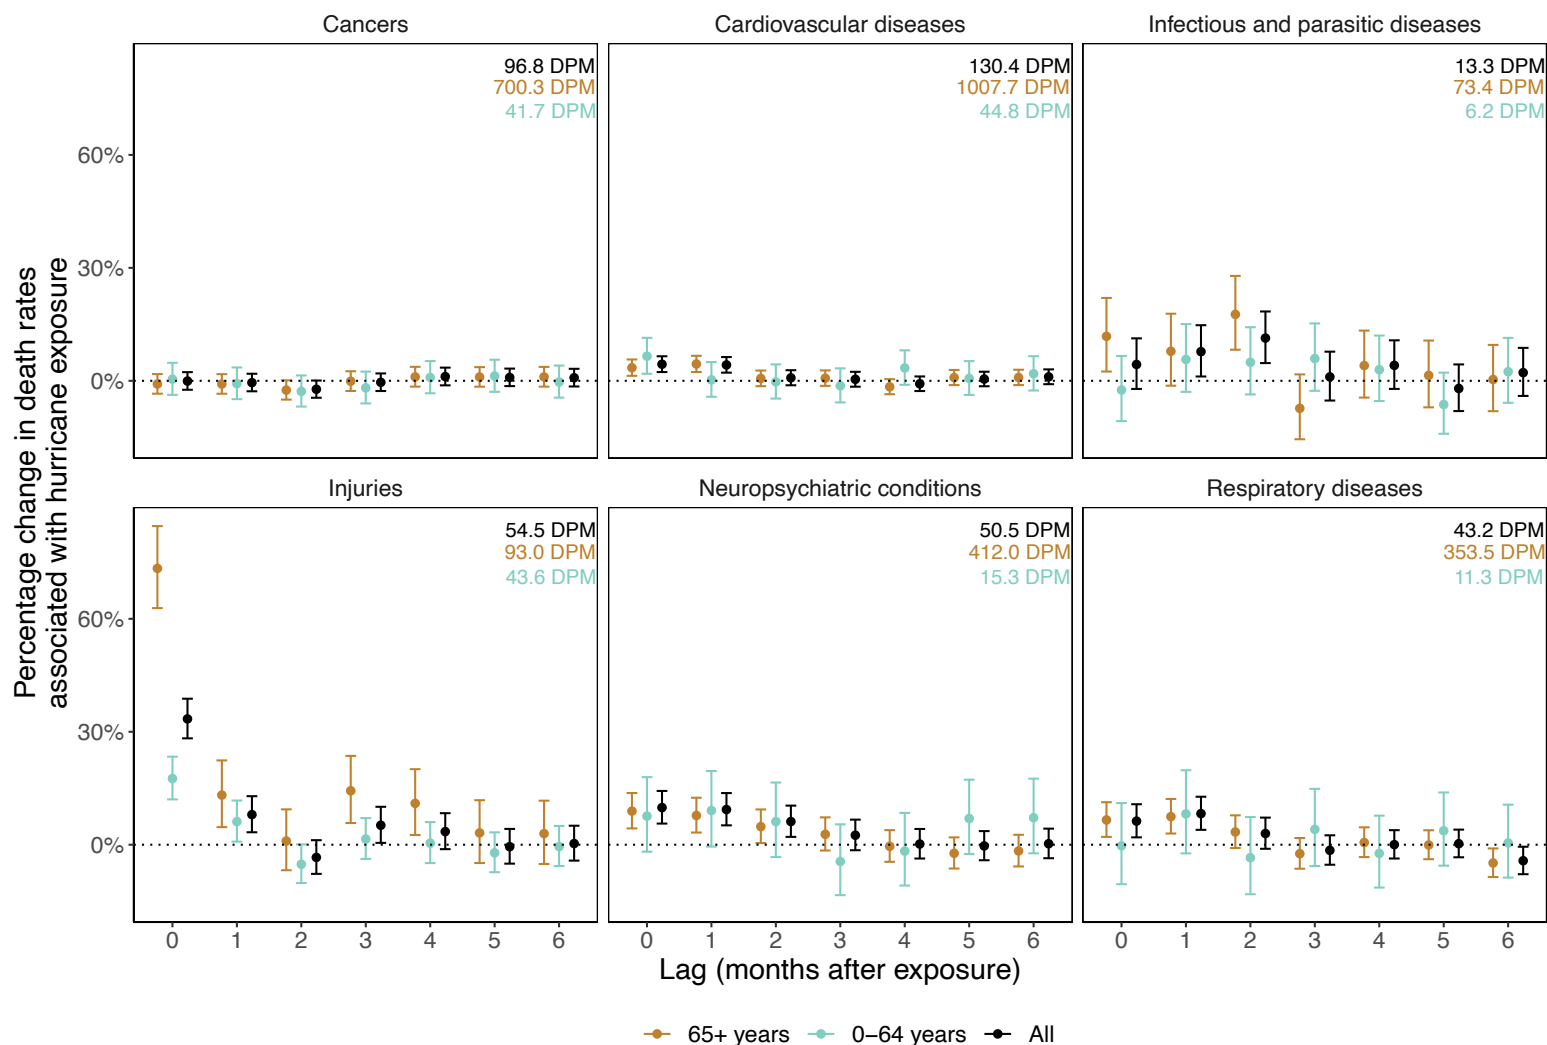

**eFigure 6.** Percentage change in death rates per one day increase in monthly hurricane exposure by cause of death, age group (0-64 years, 65+ years), and lag time. Lag time was measured in months after hurricane. Dots show the point estimates and whiskers represent 95% credible intervals. Numbers in the top-right of each panel represent overall and age group-specific deaths per 1,000,000 for 2018 monthly age-standardized median rate (DPM) for hurricane-exposed counties. Pneumonia-type deaths were classified as respiratory diseases.

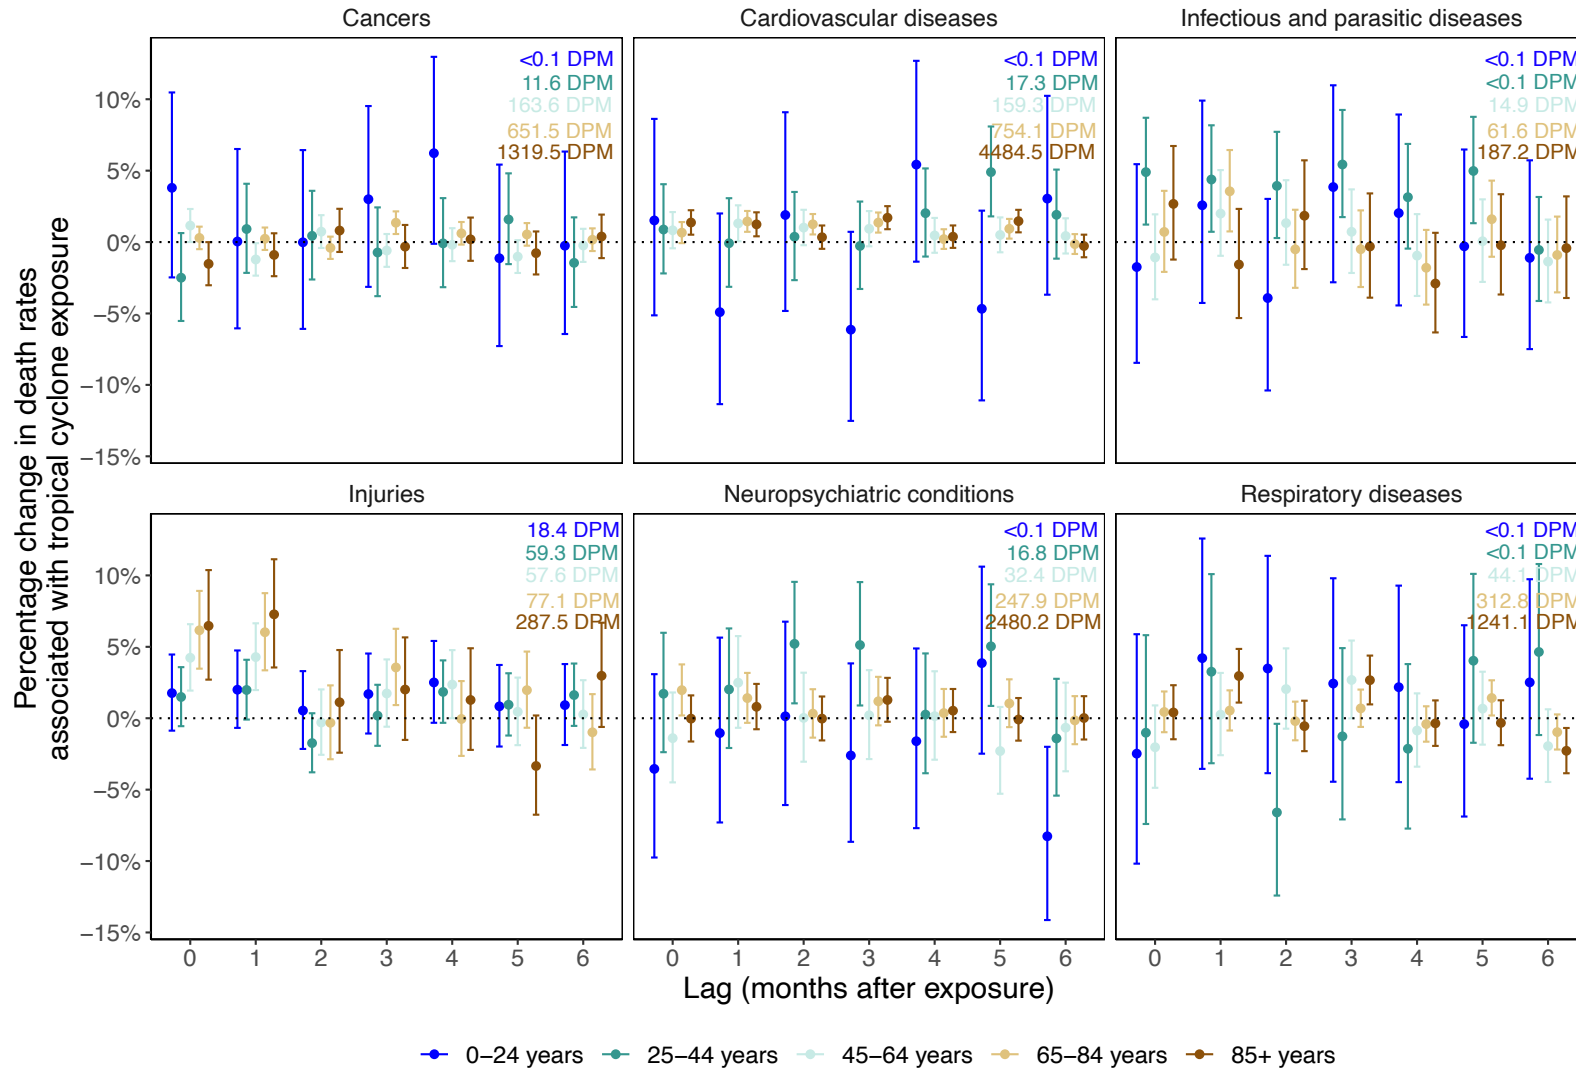

**eFigure 7.** Percentage change in death rates per one day increase in monthly tropical cyclone exposure by cause of death, age group (0-24 years, 25-44 years, 45-64 years, 65-84 years and 85+ years), and lag time. Lag time was measured in months after tropical cyclone. Dots show the point estimates and whiskers represent 95% credible intervals. Numbers in the top-right of each panel represent overall and age group-specific deaths per 1,000,000 for 2018 monthly age-standardized median rate (DPM) for tropical cyclone-exposed counties. Pneumonia-type deaths were classified as respiratory diseases.

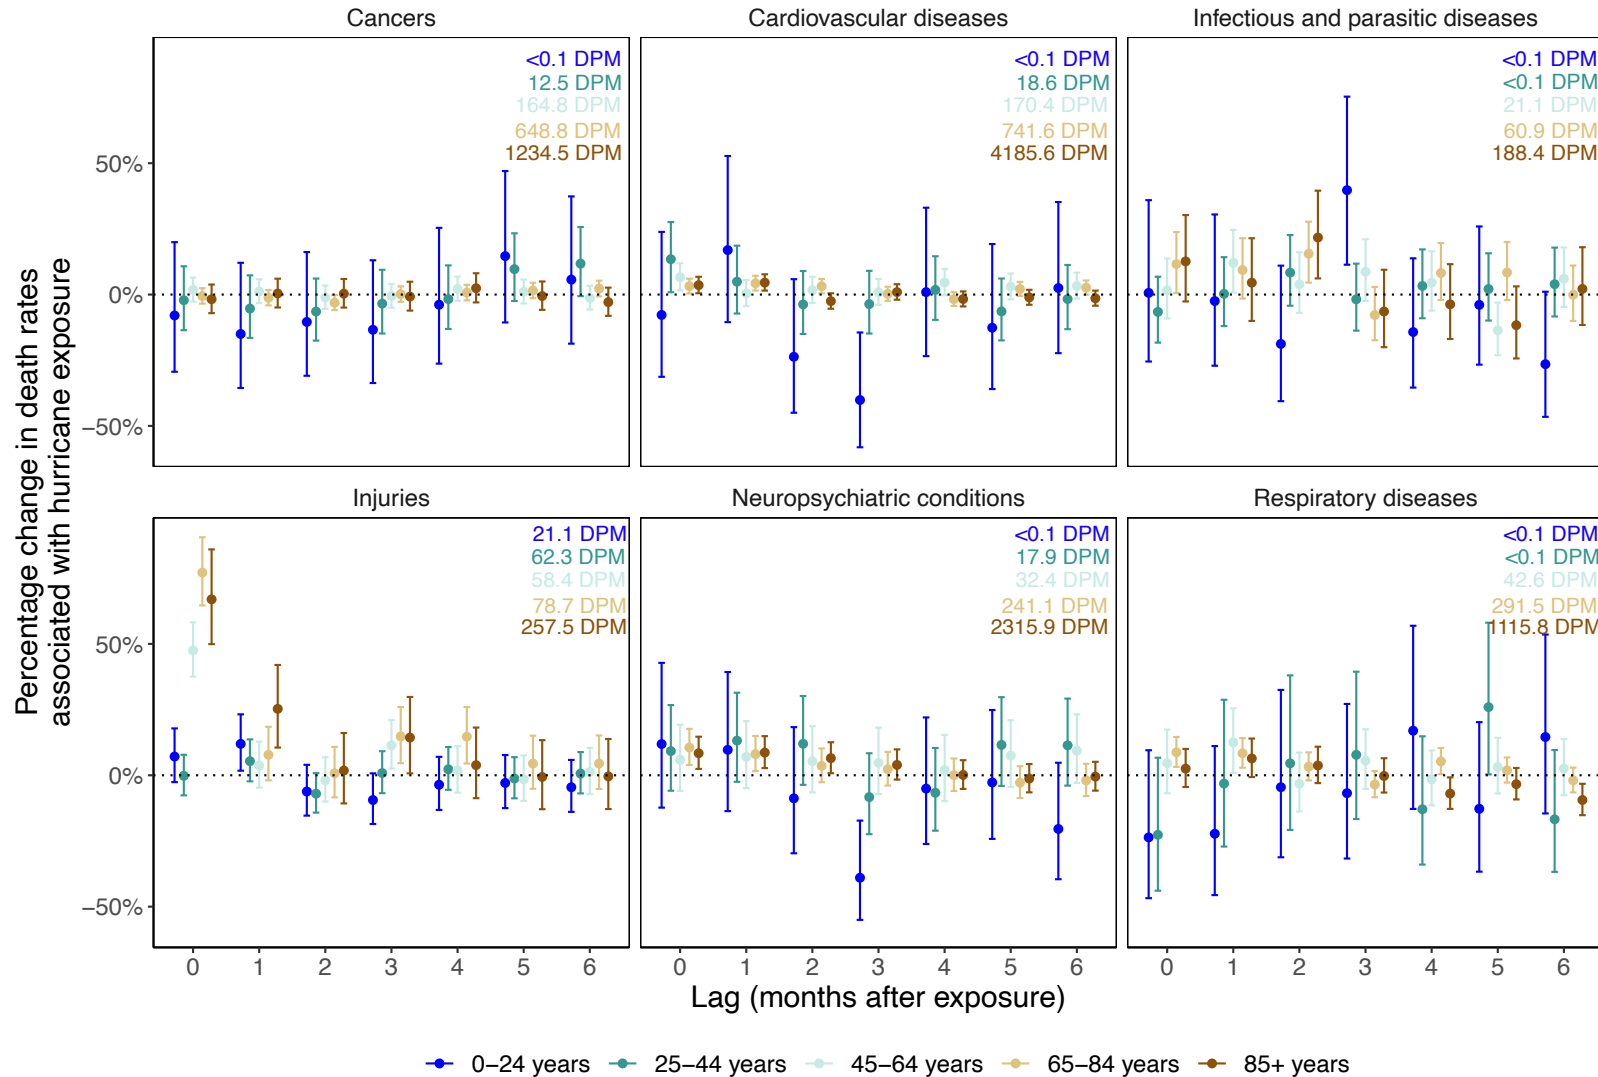

**eFigure 8.** Percentage change in death rates per one day increase in monthly hurricane exposure by cause of death, age group (0-24 years, 25-44 years, 45-64 years, 65-84 years and 85+ years), and lag time. Lag time was measured in months after hurricane. Dots show the point estimates and whiskers represent 95% credible intervals. Numbers in the top-right of each panel represent overall and age group-specific deaths per 1,000,000 for 2018 monthly age-standardized median rate (DPM) for hurricane-exposed counties. Pneumonia-type deaths were classified as respiratory diseases.

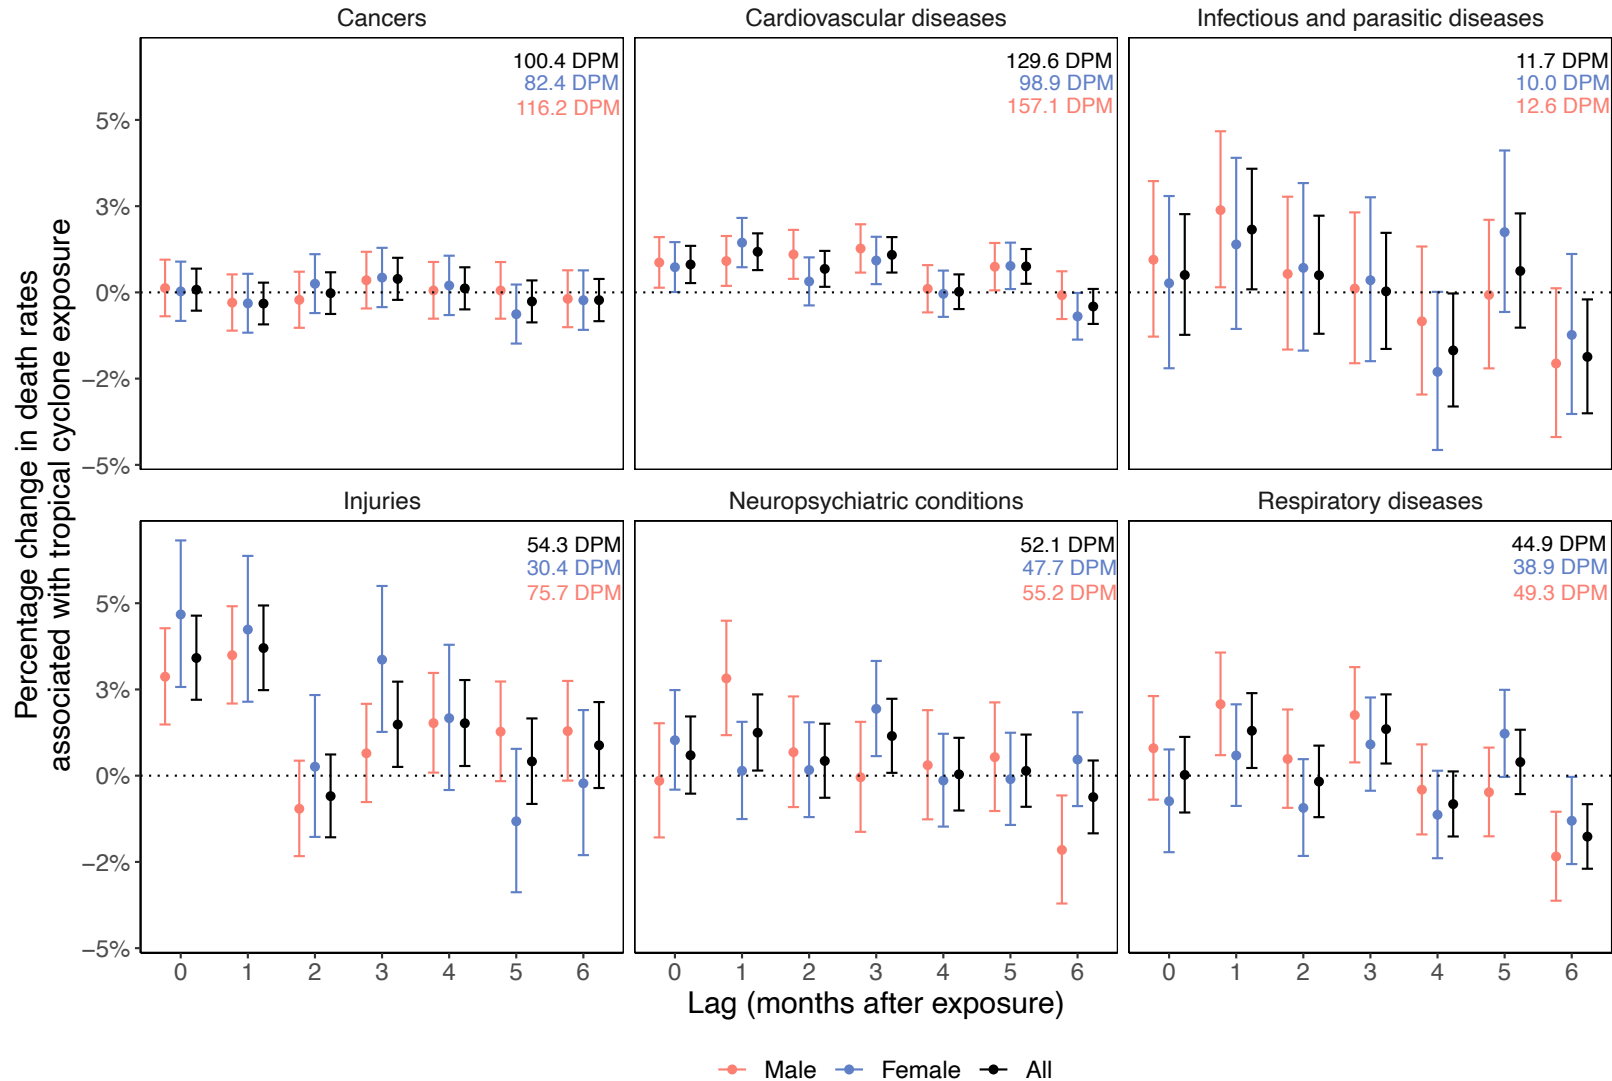

**eFigure 9.** Percentage change in death rates per one day increase in monthly tropical cyclone exposure by cause of death, sex, and lag time. Lag time was measured in months after tropical cyclone. Dots show the point estimates and whiskers represent 95% credible intervals. Numbers in the top-right of each panel represent overall and sex-specific deaths per 1,000,000 for 2018 monthly age-standardized median rate (DPM) for tropical cyclone-exposed counties. Pneumonia-type deaths were classified as respiratory diseases.

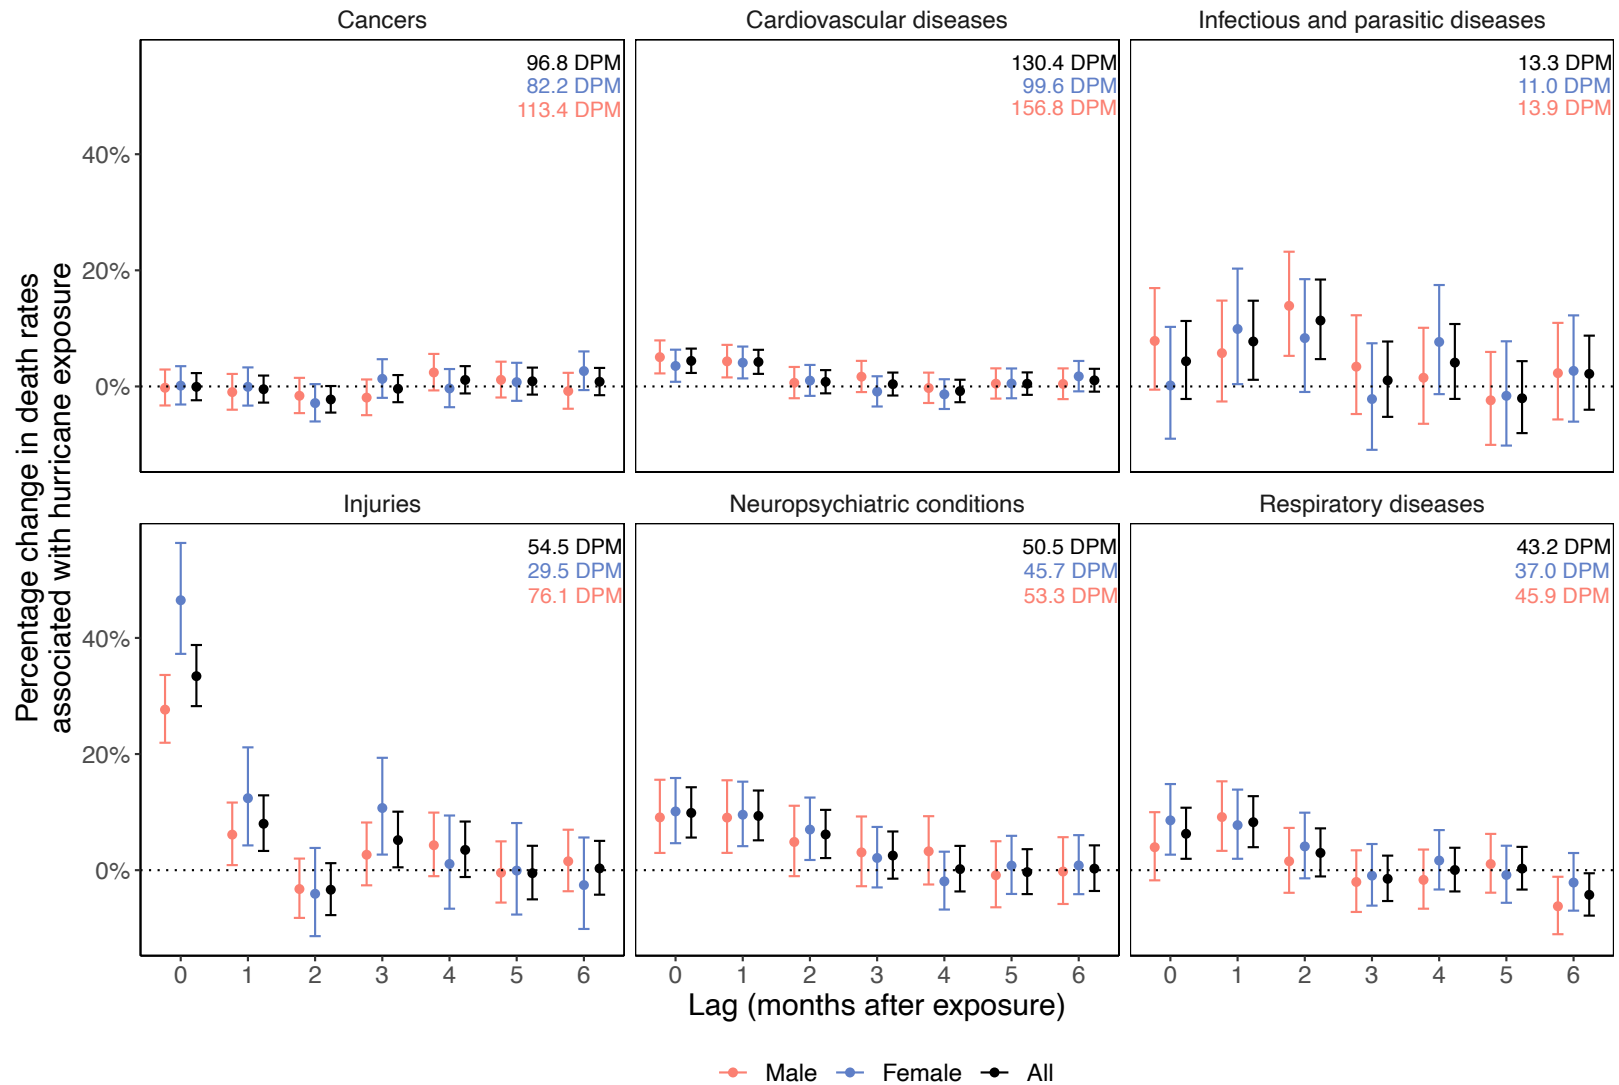

**eFigure 10.** Percentage change in death rates per one day increase in monthly hurricane exposure by cause of death, sex, and lag time. Lag time was measured in months after hurricane. Dots show the point estimates and whiskers represent 95% credible intervals. Numbers in the top-right of each panel represent overall and sex-specific deaths per 1,000,000 for 2018 monthly age-standardized median rate (DPM) for hurricane-exposed counties. Pneumonia-type deaths were classified as respiratory diseases.

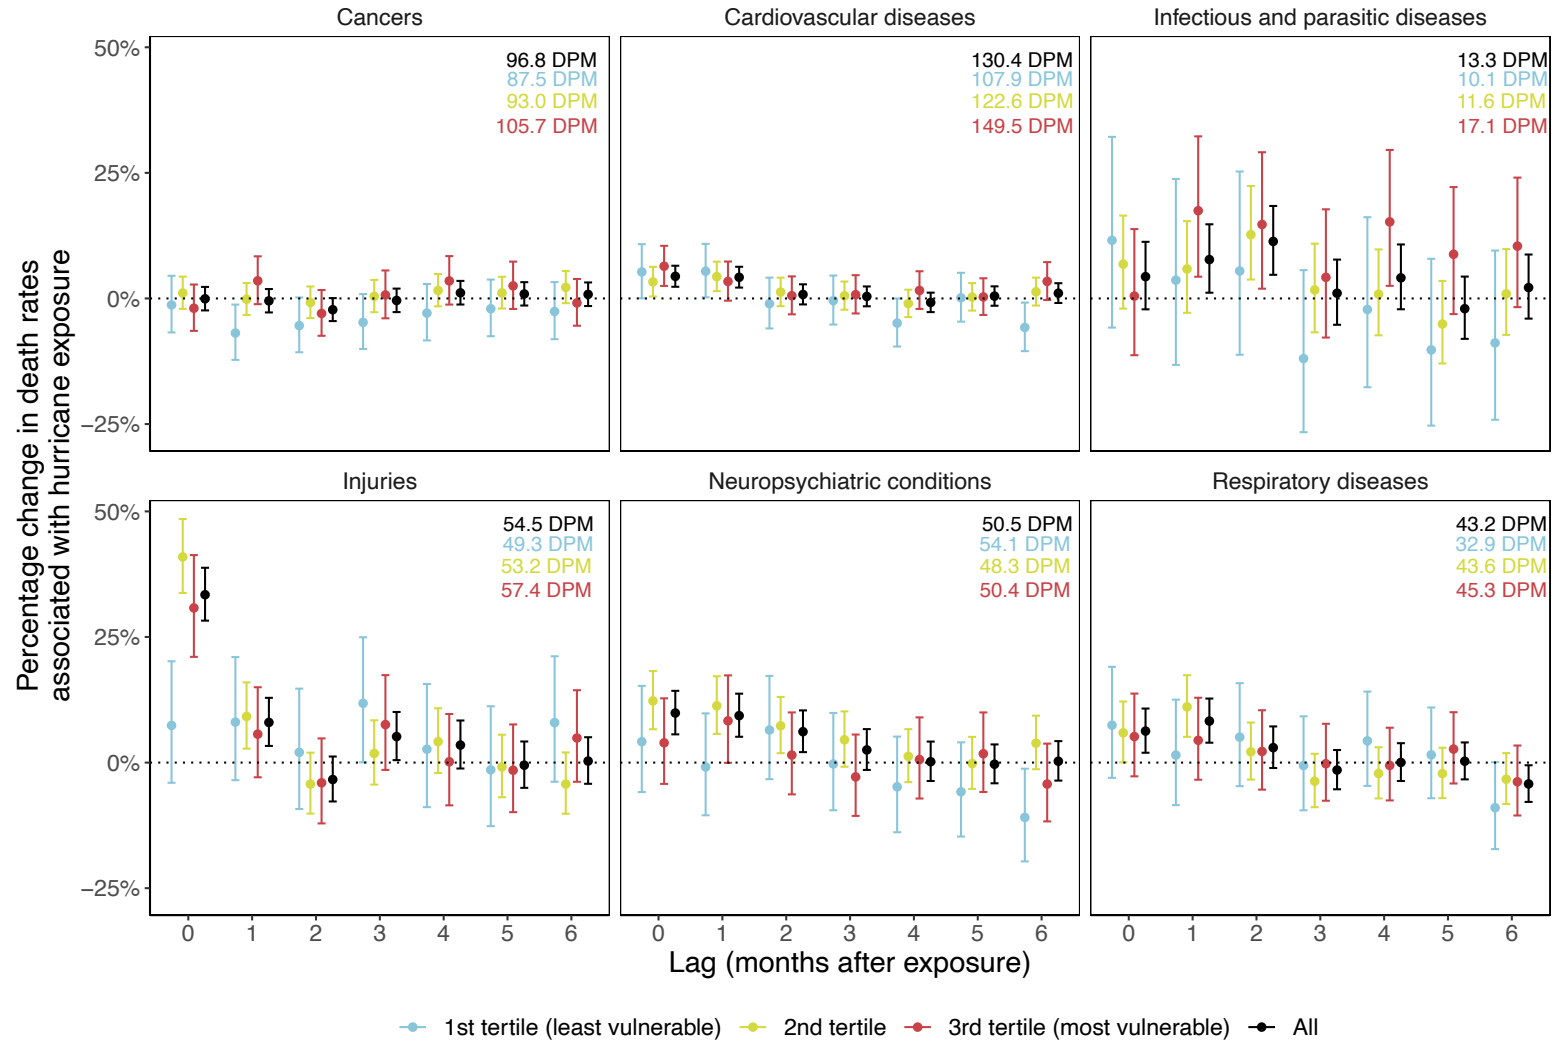

**eFigure 11.** Percentage change in death rates per one day increase in monthly hurricane exposure by cause of death, social vulnerability tertiles, and lag time. The first tertile (blue) represents lowest social vulnerability and the third tertile (red) represents highest social vulnerability. Lag time was measured in months after hurricane. Dots show the point estimates and whiskers represent 95% credible intervals. Numbers in the top-right of each panel represent overall and social vulnerability tertile-specific deaths per 1,000,000 for 2018 monthly age-standardized median rate (DPM) for hurricane-exposed counties. Pneumonia-type deaths were classified as respiratory diseases.



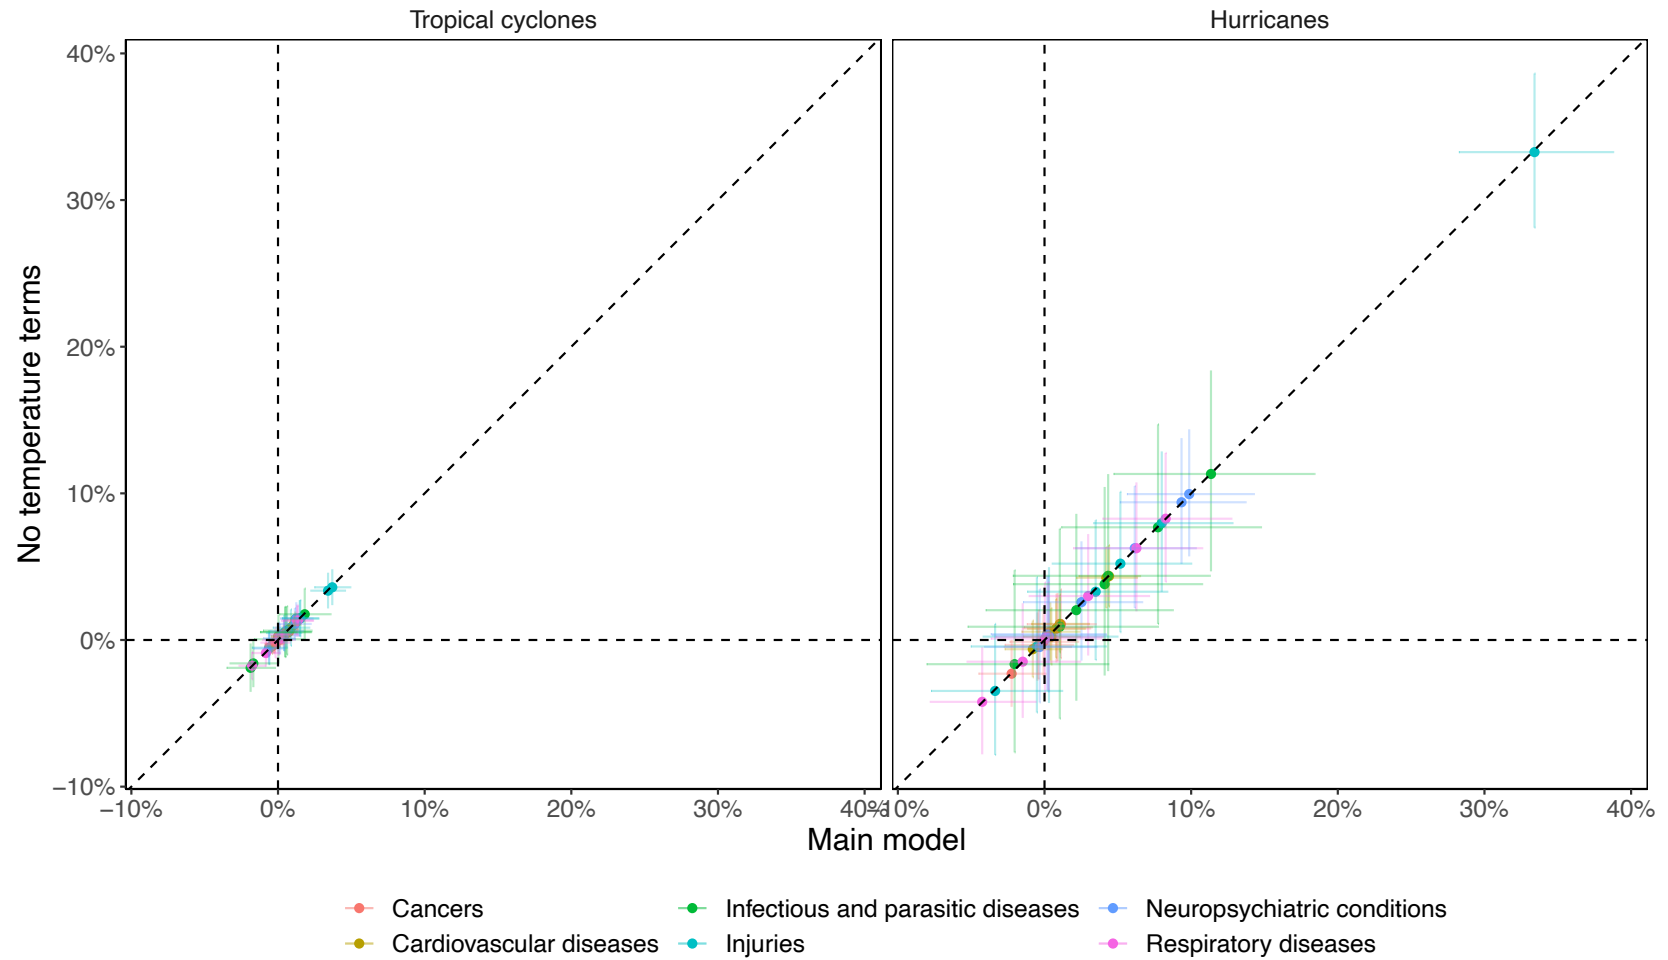

**eFigure 12.** Comparison of lag-specific coefficients by class of tropical cyclone when including or not including temperature term ( $v_{temperature_{ct}}$ ). The values from the main model are on the x-axis with values from alternative model without temperature on the y-axis. Dots show the point estimates and whiskers represent 95% credible intervals. Pneumonia-type deaths were classified as respiratory diseases.

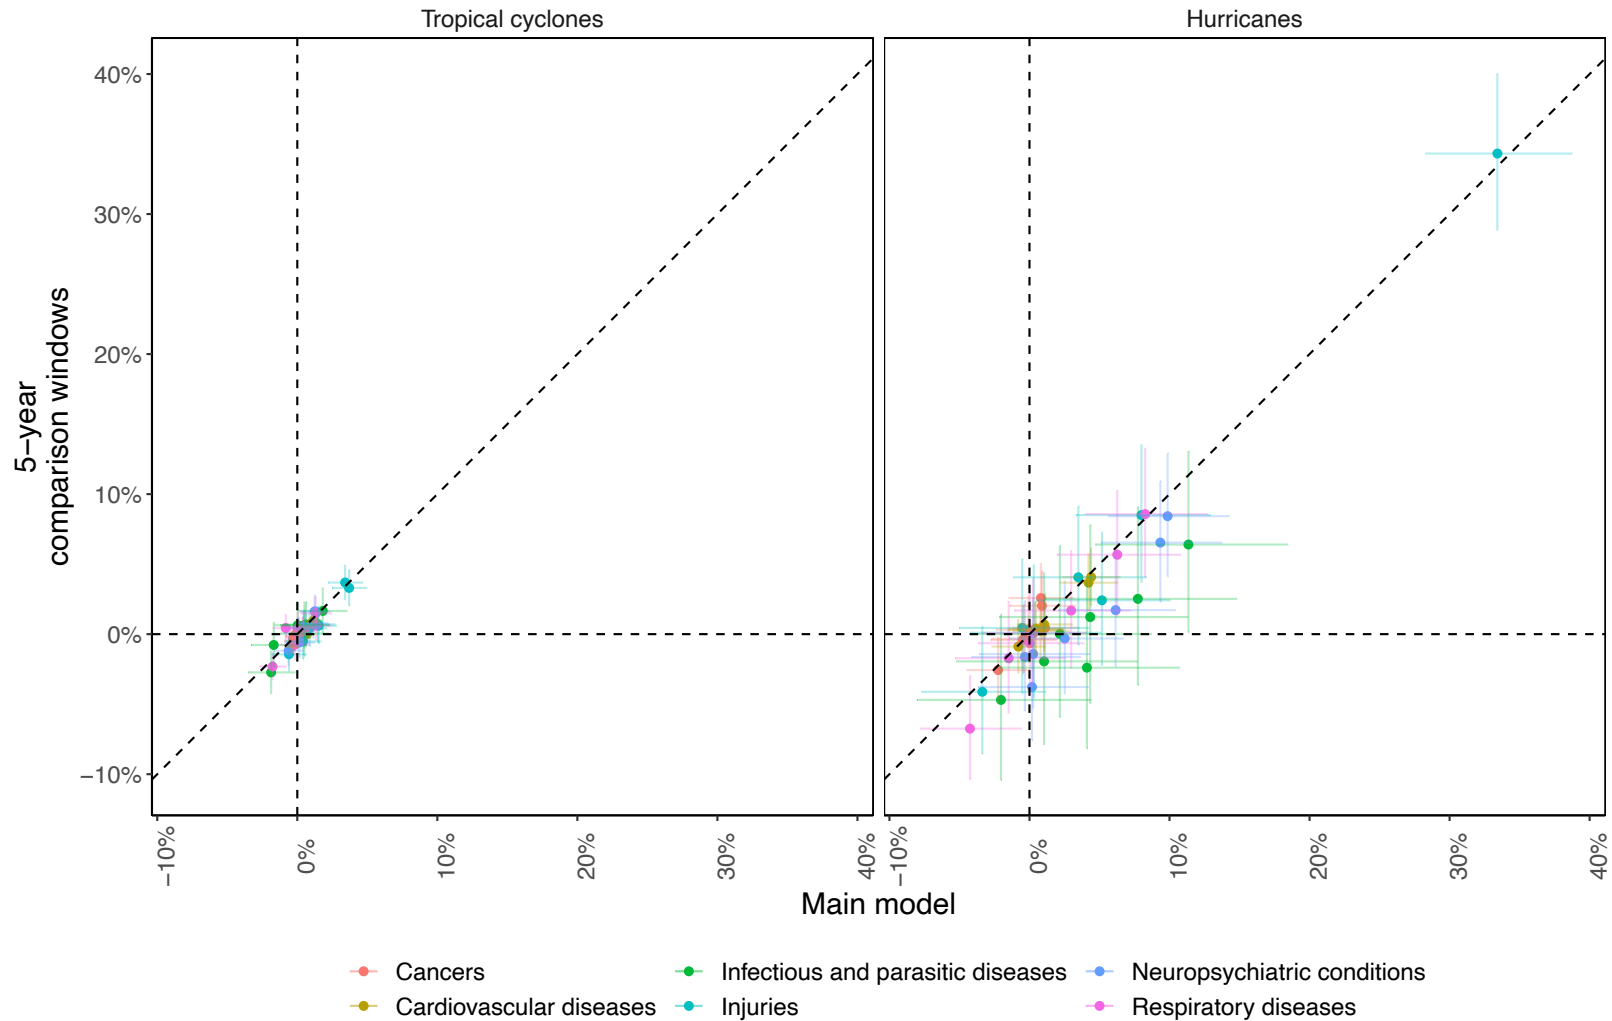

**eFigure 13.** Comparison of lag-specific coefficients by class of tropical cyclone when including or not including limit on matching control periods. The values from the main model are on the x-axis with values from alternative model with constraint of matched control periods being in same 5-year on the y-axis. Dots show the point estimates and whiskers represent 95% credible intervals. Pneumonia-type deaths were classified as respiratory diseases.
